# Supplementary material for: Altered proteome of a Burkholderia pseudomallei mutant defective in short-chain dehydrogenase affects cell adhesion, biofilm formation and heat stress tolerance
Source: PeerJ. 2020 Mar 19;8:e8659. doi: 10.7717/peerj.8659 (PMC7085900; doi:10.7717/peerj.8659)
Supplement: Supplemental Information 1 [file peerj-08-8659-s001.csv]

Header	--------------------------------------------------------
Search title	Submitted from Bp 2Jan2018 bac by Mascot Daemon on SERVER-BIOINFO
Timestamp	2018-01-05T09:19:00Z
User
Email
Report URI	http://localhost/mascot/cgi/master_results.pl?file=../data/20180105/F006312.dat
Peak list data path	C:\Users\onrapak.r\Desktop\mgf\Bp_2Jan2018\SDO_76_GB3_01_11497.mgf
Peak list format	Mascot generic
Search type	MIS
Mascot version	2.3.02
Database	NCBInr
Fasta file	NCBInr_2015_03_01.fasta
Total sequences	61390244
Total residues	21889222377
Sequences after taxonomy filter	41003219
Number of queries	869
Variable modifications	--------------------------------------------------------
Identifier	Name	Delta	Neutral loss(es)
1	Carbamidomethyl (C)	57.021464
2	Oxidation (M)	15.994915	0	63.998285
Search Parameters	--------------------------------------------------------
Taxonomy filter	. . Bacteria (Eubacteria)
Enzyme	Trypsin
Maximum Missed Cleavages	1
Fixed modifications
Variable modifications	Carbamidomethyl (C),Oxidation (M)
Peptide Mass Tolerance	0.8
Peptide Mass Tolerance Units	Da
Fragment Mass Tolerance	0.8
Fragment Mass Tolerance Units	Da
Mass values	Monoisotopic
Instrument type	ESI-QUAD-TOF
Format parameters	--------------------------------------------------------
Significance threshold	0.05
Max. number of hits	0
Use MudPIT protein scoring	1
Ions score cut-off	0
Include same-set proteins
Include sub-set proteins	0
Include unassigned	0
Require bold red	0
Use homology threshold	0
Group protein families	0
Protein hits	--------------------------------------------------------
prot_hit_num	prot_acc	prot_desc	prot_score	prot_mass	prot_matches	prot_matches_sig	prot_sequences	prot_sequences_sig	prot_cover	prot_pi	pep_query	pep_rank	pep_isbold	pep_isunique	pep_exp_mz	pep_exp_mr	pep_exp_z	pep_calc_mr	pep_delta	pep_miss	pep_score	pep_expect	pep_res_before	pep_seq	pep_res_after	pep_var_mod	pep_var_mod_pos	pep_scan_title
1	gi|664640544	putative carboxypeptidase [Burkholderia pseudomallei]	483	60112	74	15	19	6	43.9	5.47	271	1	1	0	420.7201	839.4257	2	839.4211	0.0046	0	49.13	0.62	R	SCVLAYK	L	Carbamidomethyl (C)	0.0100000.0	Cmpd 203, AutoMSn(420.7201), 15.0 min
1	gi|664640544	putative carboxypeptidase [Burkholderia pseudomallei]	483	60112	74	15	19	6	43.9	5.47	49	1	1	0	420.7205	839.4265	2	839.4211	0.0054	0	55.79	0.78	R	SCVLAYK	L	Carbamidomethyl (C)	0.0100000.0	Cmpd 199, AutoMSn(420.7205), 14.9 min
1	gi|664640544	putative carboxypeptidase [Burkholderia pseudomallei]	483	60112	74	15	19	6	43.9	5.47	272	1	1	0	420.7206	839.4267	2	839.4211	0.0056	0	36.41	12	R	SCVLAYK	L	Carbamidomethyl (C)	0.0100000.0	Cmpd 200, AutoMSn(420.7207), 15.0 min
1	gi|664640544	putative carboxypeptidase [Burkholderia pseudomallei]	483	60112	74	15	19	6	43.9	5.47	412	1	1	1	530.2949	1058.5752	2	1058.572	0.0032	0	40.37	6.4	R	VTGIESGIAGR	I			Cmpd 240, AutoMSn(530.2949), 15.9 min
1	gi|664640544	putative carboxypeptidase [Burkholderia pseudomallei]	483	60112	74	15	19	6	43.9	5.47	413	1	1	1	530.2954	1058.5763	2	1058.572	0.0043	0	63.68	0.03	R	VTGIESGIAGR	I			Cmpd 246, AutoMSn(530.2955), 16.0 min
1	gi|664640544	putative carboxypeptidase [Burkholderia pseudomallei]	483	60112	74	15	19	6	43.9	5.47	414	1	1	1	530.2966	1058.5787	2	1058.572	0.0066	0	57.55	0.12	R	VTGIESGIAGR	I			Cmpd 243, AutoMSn(530.2966), 16.0 min
1	gi|664640544	putative carboxypeptidase [Burkholderia pseudomallei]	483	60112	74	15	19	6	43.9	5.47	465	1	1	1	587.336	1172.6573	2	1172.6554	0.002	1	40.51	5.8	R	KFPQADAAVVK	N			Cmpd 209, AutoMSn(587.3359), 15.2 min
1	gi|664640544	putative carboxypeptidase [Burkholderia pseudomallei]	483	60112	74	15	19	6	43.9	5.47	466	1	1	1	587.3368	1172.6591	2	1172.6554	0.0038	1	29.15	80	R	KFPQADAAVVK	N			Cmpd 206, AutoMSn(587.3368), 15.1 min
1	gi|664640544	putative carboxypeptidase [Burkholderia pseudomallei]	483	60112	74	15	19	6	43.9	5.47	467	2	1	1	587.3371	1172.6597	2	1172.6554	0.0043	1	37.62	11	R	KFPQADAAVVK	N			Cmpd 204, AutoMSn(587.3371), 15.0 min
1	gi|664640544	putative carboxypeptidase [Burkholderia pseudomallei]	483	60112	74	15	19	6	43.9	5.47	485	1	1	1	595.8637	1189.7128	2	1189.707	0.0058	0	62.8	0.035	R	GNALFLTTLLK	A			Cmpd 642, AutoMSn(595.8637), 25.1 min
1	gi|664640544	putative carboxypeptidase [Burkholderia pseudomallei]	483	60112	74	15	19	6	43.9	5.47	486	1	1	1	595.8639	1189.7133	2	1189.707	0.0063	0	76.18	0.0016	R	GNALFLTTLLK	A			Cmpd 645, AutoMSn(595.8639), 25.1 min
1	gi|664640544	putative carboxypeptidase [Burkholderia pseudomallei]	483	60112	74	15	19	6	43.9	5.47	487	1	1	1	595.8641	1189.7136	2	1189.707	0.0066	0	40.42	6	R	GNALFLTTLLK	A			Cmpd 639, AutoMSn(595.8641), 25.0 min
1	gi|664640544	putative carboxypeptidase [Burkholderia pseudomallei]	483	60112	74	15	19	6	43.9	5.47	488	1	1	1	596.3097	1190.6047	2	1190.6044	0.0004	0	45.44	1.8	K	AQGLALGAYDGR	V			Cmpd 332, AutoMSn(596.3096), 17.9 min
1	gi|664640544	putative carboxypeptidase [Burkholderia pseudomallei]	483	60112	74	15	19	6	43.9	5.47	489	1	1	1	596.3121	1190.6096	2	1190.6044	0.0053	0	59.21	0.074	K	AQGLALGAYDGR	V			Cmpd 336, AutoMSn(596.3121), 18.0 min
1	gi|664640544	putative carboxypeptidase [Burkholderia pseudomallei]	483	60112	74	15	19	6	43.9	5.47	490	1	1	1	596.3123	1190.61	2	1190.6044	0.0056	0	56.95	0.12	K	AQGLALGAYDGR	V			Cmpd 333, AutoMSn(596.3123), 18.0 min
1	gi|664640544	putative carboxypeptidase [Burkholderia pseudomallei]	483	60112	74	15	19	6	43.9	5.47	514	1	1	0	632.3061	1262.5977	2	1262.5931	0.0045	0	75.28	0.0018	K	YLFGESYGTAR	S			Cmpd 378, AutoMSn(632.3061), 19.1 min
1	gi|664640544	putative carboxypeptidase [Burkholderia pseudomallei]	483	60112	74	15	19	6	43.9	5.47	515	1	1	0	632.3062	1262.5978	2	1262.5931	0.0046	0	68.67	0.0081	K	YLFGESYGTAR	S			Cmpd 375, AutoMSn(632.3062), 19.0 min
1	gi|664640544	putative carboxypeptidase [Burkholderia pseudomallei]	483	60112	74	15	19	6	43.9	5.47	516	1	1	0	632.3079	1262.6013	2	1262.5931	0.0081	0	58.9	0.077	K	YLFGESYGTAR	S			Cmpd 381, AutoMSn(632.3079), 19.1 min
1	gi|664640544	putative carboxypeptidase [Burkholderia pseudomallei]	483	60112	74	15	19	6	43.9	5.47	588	1	1	1	726.3553	1450.696	2	1450.6915	0.0045	0	28.25	81	R	TSMPSFTPPAPYR	M			Cmpd 450, AutoMSn(726.3553), 20.7 min
1	gi|664640544	putative carboxypeptidase [Burkholderia pseudomallei]	483	60112	74	15	19	6	43.9	5.47	222	1	1	1	726.3554	1450.6962	2	1450.6915	0.0047	0	46.57	3.2	R	TSMPSFTPPAPYR	M			Cmpd 445, AutoMSn(726.3554), 20.6 min
1	gi|664640544	putative carboxypeptidase [Burkholderia pseudomallei]	483	60112	74	15	19	6	43.9	5.47	589	1	1	1	726.357	1450.6994	2	1450.6915	0.0079	0	49.6	0.6	R	TSMPSFTPPAPYR	M			Cmpd 447, AutoMSn(726.3570), 20.6 min
1	gi|664640544	putative carboxypeptidase [Burkholderia pseudomallei]	483	60112	74	15	19	6	43.9	5.47	600	1	1	1	734.3519	1466.6892	2	1466.6864	0.0028	0	61.89	0.035	R	TSMPSFTPPAPYR	M	Oxidation (M)	0.0020000000000.0	Cmpd 363, AutoMSn(734.3519), 18.7 min
1	gi|664640544	putative carboxypeptidase [Burkholderia pseudomallei]	483	60112	74	15	19	6	43.9	5.47	601	2	1	1	734.3531	1466.6917	2	1466.6864	0.0053	0	14.74	1.80E+03	R	TSMPSFTPPAPYR	M	Oxidation (M)	0.0020000000000.0	Cmpd 357, AutoMSn(734.3531), 18.6 min
1	gi|664640544	putative carboxypeptidase [Burkholderia pseudomallei]	483	60112	74	15	19	6	43.9	5.47	603	1	1	1	734.3544	1466.6943	2	1466.6864	0.0079	0	60.99	0.043	R	TSMPSFTPPAPYR	M	Oxidation (M)	0.0020000000000.0	Cmpd 360, AutoMSn(734.3544), 18.7 min
1	gi|664640544	putative carboxypeptidase [Burkholderia pseudomallei]	483	60112	74	15	19	6	43.9	5.47	604	1	1	1	489.9066	1466.698	3	1466.6864	0.0116	0	35.37	16	R	TSMPSFTPPAPYR	M	Oxidation (M)	0.0020000000000.0	Cmpd 368, AutoMSn(489.9066), 18.8 min
1	gi|664640544	putative carboxypeptidase [Burkholderia pseudomallei]	483	60112	74	15	19	6	43.9	5.47	618	1	1	1	747.8461	1493.6776	2	1493.6787	-0.001	0	33.26	26	R	DFWGVDQDANSIK	Q			Cmpd 523, AutoMSn(747.8461), 22.3 min
1	gi|664640544	putative carboxypeptidase [Burkholderia pseudomallei]	483	60112	74	15	19	6	43.9	5.47	619	2	1	1	747.8489	1493.6832	2	1493.6787	0.0045	0	31.64	37	R	DFWGVDQDANSIK	Q			Cmpd 525, AutoMSn(747.8489), 22.4 min
1	gi|664640544	putative carboxypeptidase [Burkholderia pseudomallei]	483	60112	74	15	19	6	43.9	5.47	620	2	1	1	498.9018	1493.6836	3	1493.6787	0.0049	0	23.32	2.50E+02	R	DFWGVDQDANSIK	Q			Cmpd 526, AutoMSn(498.9018), 22.4 min
1	gi|664640544	putative carboxypeptidase [Burkholderia pseudomallei]	483	60112	74	15	19	6	43.9	5.47	622	1	1	1	747.8494	1493.6842	2	1493.6787	0.0055	0	51.72	0.36	R	DFWGVDQDANSIK	Q			Cmpd 527, AutoMSn(747.8494), 22.4 min
1	gi|664640544	putative carboxypeptidase [Burkholderia pseudomallei]	483	60112	74	15	19	6	43.9	5.47	667	1	1	0	562.6007	1684.7804	3	1684.7668	0.0136	0	40.1	5.1	R	FYPSGHMVYLDGGSR	T			Cmpd 354, AutoMSn(562.6007), 18.5 min
1	gi|664640544	putative carboxypeptidase [Burkholderia pseudomallei]	483	60112	74	15	19	6	43.9	5.47	668	1	1	0	562.6009	1684.7809	3	1684.7668	0.0141	0	42.36	3.1	R	FYPSGHMVYLDGGSR	T			Cmpd 351, AutoMSn(562.6009), 18.5 min
1	gi|664640544	putative carboxypeptidase [Burkholderia pseudomallei]	483	60112	74	15	19	6	43.9	5.47	671	9	1	0	851.3935	1700.7725	2	1700.7617	0.0108	0	17.36	9.80E+02	R	FYPSGHMVYLDGGSR	T	Oxidation (M)	0.000000200000000.0	Cmpd 281, AutoMSn(851.3935), 16.8 min
1	gi|664640544	putative carboxypeptidase [Burkholderia pseudomallei]	483	60112	74	15	19	6	43.9	5.47	672	1	1	0	567.9324	1700.7755	3	1700.7617	0.0138	0	30.77	45	R	FYPSGHMVYLDGGSR	T	Oxidation (M)	0.000000200000000.0	Cmpd 279, AutoMSn(567.9324), 16.8 min
1	gi|664640544	putative carboxypeptidase [Burkholderia pseudomallei]	483	60112	74	15	19	6	43.9	5.47	673	1	1	0	567.9327	1700.7763	3	1700.7617	0.0146	0	51.02	0.42	R	FYPSGHMVYLDGGSR	T	Oxidation (M)	0.000000200000000.0	Cmpd 276, AutoMSn(567.9327), 16.7 min
1	gi|664640544	putative carboxypeptidase [Burkholderia pseudomallei]	483	60112	74	15	19	6	43.9	5.47	674	1	1	0	567.9338	1700.7797	3	1700.7617	0.018	0	47.97	0.85	R	FYPSGHMVYLDGGSR	T	Oxidation (M)	0.000000200000000.0	Cmpd 282, AutoMSn(567.9338), 16.8 min
1	gi|664640544	putative carboxypeptidase [Burkholderia pseudomallei]	483	60112	74	15	19	6	43.9	5.47	702	1	1	0	919.4184	1836.8222	2	1836.8166	0.0056	0	40.3	4.7	K	YTSNSSFTDLNDQAFK	Y			Cmpd 418, AutoMSn(919.4184), 19.9 min
1	gi|664640544	putative carboxypeptidase [Burkholderia pseudomallei]	483	60112	74	15	19	6	43.9	5.47	703	1	1	0	919.4191	1836.8237	2	1836.8166	0.0071	0	29.76	54	K	YTSNSSFTDLNDQAFK	Y			Cmpd 421, AutoMSn(919.4191), 20.0 min
1	gi|664640544	putative carboxypeptidase [Burkholderia pseudomallei]	483	60112	74	15	19	6	43.9	5.47	704	1	1	0	613.2855	1836.8348	3	1836.8166	0.0182	0	40.03	5	K	YTSNSSFTDLNDQAFK	Y			Cmpd 420, AutoMSn(613.2855), 20.0 min
1	gi|664640544	putative carboxypeptidase [Burkholderia pseudomallei]	483	60112	74	15	19	6	43.9	5.47	705	1	1	0	613.2858	1836.8355	3	1836.8166	0.0188	0	44.16	1.9	K	YTSNSSFTDLNDQAFK	Y			Cmpd 417, AutoMSn(613.2858), 19.9 min
1	gi|664640544	putative carboxypeptidase [Burkholderia pseudomallei]	483	60112	74	15	19	6	43.9	5.47	158	2	1	0	613.2896	1836.847	3	1836.8166	0.0304	0	23.43	6.60E+02	K	YTSNSSFTDLNDQAFK	Y			Cmpd 415, AutoMSn(613.2896), 19.9 min
1	gi|664640544	putative carboxypeptidase [Burkholderia pseudomallei]	483	60112	74	15	19	6	43.9	5.47	726	2	1	1	631.6618	1891.9635	3	1891.9462	0.0173	1	20.72	4.00E+02	R	TTLKHDLAQMYESTVR	D			Cmpd 337, AutoMSn(631.6618), 18.1 min
1	gi|664640544	putative carboxypeptidase [Burkholderia pseudomallei]	483	60112	74	15	19	6	43.9	5.47	728	1	1	1	636.991	1907.9511	3	1907.9411	0.01	1	33.87	19	R	TTLKHDLAQMYESTVR	D	Oxidation (M)	0.0000000002000000.0	Cmpd 226, AutoMSn(636.9910), 15.6 min
1	gi|664640544	putative carboxypeptidase [Burkholderia pseudomallei]	483	60112	74	15	19	6	43.9	5.47	729	2	1	1	636.9926	1907.956	3	1907.9411	0.0149	1	26.89	95	R	TTLKHDLAQMYESTVR	D	Oxidation (M)	0.0000000002000000.0	Cmpd 223, AutoMSn(636.9926), 15.5 min
1	gi|664640544	putative carboxypeptidase [Burkholderia pseudomallei]	483	60112	74	15	19	6	43.9	5.47	730	3	1	1	636.9931	1907.9574	3	1907.9411	0.0163	1	26	1.20E+02	R	TTLKHDLAQMYESTVR	D	Oxidation (M)	0.0000000002000000.0	Cmpd 222, AutoMSn(636.9931), 15.4 min
1	gi|664640544	putative carboxypeptidase [Burkholderia pseudomallei]	483	60112	74	15	19	6	43.9	5.47	747	1	1	0	679.827	2036.4592	3	2037.0068	-0.5476	0	21.19	6.60E+02	R	QAGNPVGALPTAAADAWYHK	R			Cmpd 461, AutoMSn(679.8270), 20.9 min
1	gi|664640544	putative carboxypeptidase [Burkholderia pseudomallei]	483	60112	74	15	19	6	43.9	5.47	748	1	1	0	680.0139	2037.0198	3	2037.0068	0.0129	0	25.55	1.20E+02	R	QAGNPVGALPTAAADAWYHK	R			Cmpd 465, AutoMSn(680.0139), 21.0 min
1	gi|664640544	putative carboxypeptidase [Burkholderia pseudomallei]	483	60112	74	15	19	6	43.9	5.47	749	1	1	0	680.0143	2037.021	3	2037.0068	0.0142	0	23.59	1.90E+02	R	QAGNPVGALPTAAADAWYHK	R			Cmpd 464, AutoMSn(680.0143), 21.0 min
1	gi|664640544	putative carboxypeptidase [Burkholderia pseudomallei]	483	60112	74	15	19	6	43.9	5.47	763	1	1	1	721.6708	2161.9905	3	2161.9705	0.02	0	47.65	0.78	K	YWDFGHIDPTGEQQGVDAK	G			Cmpd 460, AutoMSn(721.6708), 20.9 min
1	gi|664640544	putative carboxypeptidase [Burkholderia pseudomallei]	483	60112	74	15	19	6	43.9	5.47	764	1	1	1	721.6716	2161.9928	3	2161.9705	0.0223	0	51.04	0.36	K	YWDFGHIDPTGEQQGVDAK	G			Cmpd 463, AutoMSn(721.6716), 21.0 min
1	gi|664640544	putative carboxypeptidase [Burkholderia pseudomallei]	483	60112	74	15	19	6	43.9	5.47	765	10	1	1	721.6736	2161.9991	3	2161.9705	0.0286	0	18.59	6.30E+02	K	YWDFGHIDPTGEQQGVDAK	G			Cmpd 456, AutoMSn(721.6737), 20.8 min
1	gi|664640544	putative carboxypeptidase [Burkholderia pseudomallei]	483	60112	74	15	19	6	43.9	5.47	769	1	1	1	732.0508	2193.1305	3	2193.1079	0.0225	1	36.76	9	R	QAGNPVGALPTAAADAWYHKR	L			Cmpd 396, AutoMSn(732.0508), 19.5 min
1	gi|664640544	putative carboxypeptidase [Burkholderia pseudomallei]	483	60112	74	15	19	6	43.9	5.47	771	1	1	1	732.0519	2193.134	3	2193.1079	0.0261	1	36.55	9.4	R	QAGNPVGALPTAAADAWYHKR	L			Cmpd 394, AutoMSn(732.0519), 19.4 min
1	gi|664640544	putative carboxypeptidase [Burkholderia pseudomallei]	483	60112	74	15	19	6	43.9	5.47	775	2	1	1	744.7356	2231.185	3	2231.1658	0.0192	1	30.24	41	K	AQGLALGAYDGRVTGIESGIAGR	I			Cmpd 475, AutoMSn(744.7356), 21.2 min
1	gi|664640544	putative carboxypeptidase [Burkholderia pseudomallei]	483	60112	74	15	19	6	43.9	5.47	776	1	1	1	744.736	2231.1861	3	2231.1658	0.0202	1	31.58	30	K	AQGLALGAYDGRVTGIESGIAGR	I			Cmpd 462, AutoMSn(744.7360), 21.0 min
1	gi|664640544	putative carboxypeptidase [Burkholderia pseudomallei]	483	60112	74	15	19	6	43.9	5.47	777	1	1	1	744.7368	2231.1884	3	2231.1658	0.0226	1	30.33	41	K	AQGLALGAYDGRVTGIESGIAGR	I			Cmpd 459, AutoMSn(744.7367), 20.9 min
1	gi|664640544	putative carboxypeptidase [Burkholderia pseudomallei]	483	60112	74	15	19	6	43.9	5.47	778	6	1	1	744.7371	2231.1894	3	2231.1658	0.0235	1	22.19	2.70E+02	K	AQGLALGAYDGRVTGIESGIAGR	I			Cmpd 458, AutoMSn(744.7371), 20.9 min
1	gi|664640544	putative carboxypeptidase [Burkholderia pseudomallei]	483	60112	74	15	19	6	43.9	5.47	781	7	1	1	763.4002	2287.1787	3	2287.1849	-0.0062	0	23.67	1.80E+02	R	LGVAPTPTDLGAFVEEVAQFAR	T			Cmpd 878, AutoMSn(763.4002), 31.6 min
1	gi|664640544	putative carboxypeptidase [Burkholderia pseudomallei]	483	60112	74	15	19	6	43.9	5.47	783	6	1	1	1144.6066	2287.1987	2	2287.1849	0.0139	0	22.74	2.30E+02	R	LGVAPTPTDLGAFVEEVAQFAR	T			Cmpd 899, AutoMSn(1144.6066), 32.1 min
1	gi|664640544	putative carboxypeptidase [Burkholderia pseudomallei]	483	60112	74	15	19	6	43.9	5.47	784	1	1	1	1144.6069	2287.1993	2	2287.1849	0.0144	0	34.17	16	R	LGVAPTPTDLGAFVEEVAQFAR	T			Cmpd 904, AutoMSn(1144.6069), 32.2 min
1	gi|664640544	putative carboxypeptidase [Burkholderia pseudomallei]	483	60112	74	15	19	6	43.9	5.47	785	2	1	1	1144.607	2287.1995	2	2287.1849	0.0146	0	22.82	2.20E+02	R	LGVAPTPTDLGAFVEEVAQFAR	T			Cmpd 886, AutoMSn(1144.6070), 31.7 min
1	gi|664640544	putative carboxypeptidase [Burkholderia pseudomallei]	483	60112	74	15	19	6	43.9	5.47	786	1	1	1	763.4077	2287.2012	3	2287.1849	0.0164	0	65.31	0.012	R	LGVAPTPTDLGAFVEEVAQFAR	T			Cmpd 880, AutoMSn(763.4077), 31.6 min
1	gi|664640544	putative carboxypeptidase [Burkholderia pseudomallei]	483	60112	74	15	19	6	43.9	5.47	787	1	1	1	763.4092	2287.2058	3	2287.1849	0.0209	0	77.58	0.00074	R	LGVAPTPTDLGAFVEEVAQFAR	T			Cmpd 883, AutoMSn(763.4092), 31.7 min
1	gi|664640544	putative carboxypeptidase [Burkholderia pseudomallei]	483	60112	74	15	19	6	43.9	5.47	788	2	1	1	763.4095	2287.2066	3	2287.1849	0.0217	0	65.29	0.013	R	LGVAPTPTDLGAFVEEVAQFAR	T			Cmpd 902, AutoMSn(763.4095), 32.2 min
1	gi|664640544	putative carboxypeptidase [Burkholderia pseudomallei]	483	60112	74	15	19	6	43.9	5.47	790	1	1	1	763.41	2287.2081	3	2287.1849	0.0233	0	62.15	0.026	R	LGVAPTPTDLGAFVEEVAQFAR	T			Cmpd 897, AutoMSn(763.4100), 32.0 min
1	gi|664640544	putative carboxypeptidase [Burkholderia pseudomallei]	483	60112	74	15	19	6	43.9	5.47	791	1	1	1	763.4113	2287.2121	3	2287.1849	0.0273	0	109.35	5.00E-07	R	LGVAPTPTDLGAFVEEVAQFAR	T			Cmpd 898, AutoMSn(763.4113), 32.1 min
1	gi|664640544	putative carboxypeptidase [Burkholderia pseudomallei]	483	60112	74	15	19	6	43.9	5.47	805	1	1	0	786.7427	2357.2063	3	2357.1863	0.02	0	58.74	0.055	K	LHEDGVDLNGITLQSSILDYR	Q			Cmpd 605, AutoMSn(786.7427), 24.2 min
1	gi|664640544	putative carboxypeptidase [Burkholderia pseudomallei]	483	60112	74	15	19	6	43.9	5.47	806	1	1	0	786.7432	2357.2078	3	2357.1863	0.0215	0	55.75	0.11	K	LHEDGVDLNGITLQSSILDYR	Q			Cmpd 608, AutoMSn(786.7432), 24.3 min
1	gi|664640544	putative carboxypeptidase [Burkholderia pseudomallei]	483	60112	74	15	19	6	43.9	5.47	807	1	1	0	786.7449	2357.2129	3	2357.1863	0.0266	0	52.53	0.23	K	LHEDGVDLNGITLQSSILDYR	Q			Cmpd 611, AutoMSn(786.7449), 24.3 min
1	gi|664640544	putative carboxypeptidase [Burkholderia pseudomallei]	483	60112	74	15	19	6	43.9	5.47	819	1	1	1	800.7483	2399.223	3	2399.1969	0.0262	0	95.42	1.20E-05	R	TIAYTAAAGHLVTVDPSSSQPDAK	I			Cmpd 387, AutoMSn(800.7483), 19.3 min
1	gi|664640544	putative carboxypeptidase [Burkholderia pseudomallei]	483	60112	74	15	19	6	43.9	5.47	820	1	1	1	800.7486	2399.2238	3	2399.1969	0.027	0	64.78	0.013	R	TIAYTAAAGHLVTVDPSSSQPDAK	I			Cmpd 382, AutoMSn(800.7485), 19.1 min
1	gi|664640544	putative carboxypeptidase [Burkholderia pseudomallei]	483	60112	74	15	19	6	43.9	5.47	821	1	1	1	800.7486	2399.2238	3	2399.1969	0.027	0	72.26	0.0024	R	TIAYTAAAGHLVTVDPSSSQPDAK	I			Cmpd 384, AutoMSn(800.7486), 19.2 min
1	gi|664640544	putative carboxypeptidase [Burkholderia pseudomallei]	483	60112	74	15	19	6	43.9	5.47	828	1	1	1	815.4407	2443.3003	3	2443.286	0.0143	1	22.41	2.40E+02	K	RLGVAPTPTDLGAFVEEVAQFAR	T			Cmpd 794, AutoMSn(815.4407), 28.7 min
1	gi|664640544	putative carboxypeptidase [Burkholderia pseudomallei]	483	60112	74	15	19	6	43.9	5.47	829	9	1	1	815.4455	2443.3146	3	2443.286	0.0286	1	17.36	7.90E+02	K	RLGVAPTPTDLGAFVEEVAQFAR	T			Cmpd 796, AutoMSn(815.4455), 28.8 min
1	gi|664640544	putative carboxypeptidase [Burkholderia pseudomallei]	483	60112	74	15	19	6	43.9	5.47	830	1	1	1	815.4464	2443.3175	3	2443.286	0.0315	1	46.84	0.89	K	RLGVAPTPTDLGAFVEEVAQFAR	T			Cmpd 799, AutoMSn(815.4464), 28.9 min	emPAI	1.11
2	gi|504711273	peptidase S1 [Burkholderia cepacia]	176	60079	22	5	5	2	13.4	5.61	271	1	0	0	420.7201	839.4257	2	839.4211	0.0046	0	49.13	0.62	R	SCVLAYK	L	Carbamidomethyl (C)	0.0100000.0	Cmpd 203, AutoMSn(420.7201), 15.0 min
2	gi|504711273	peptidase S1 [Burkholderia cepacia]	176	60079	22	5	5	2	13.4	5.61	49	1	0	0	420.7205	839.4265	2	839.4211	0.0054	0	55.79	0.78	R	SCVLAYK	L	Carbamidomethyl (C)	0.0100000.0	Cmpd 199, AutoMSn(420.7205), 14.9 min
2	gi|504711273	peptidase S1 [Burkholderia cepacia]	176	60079	22	5	5	2	13.4	5.61	272	1	0	0	420.7206	839.4267	2	839.4211	0.0056	0	36.41	12	R	SCVLAYK	L	Carbamidomethyl (C)	0.0100000.0	Cmpd 200, AutoMSn(420.7207), 15.0 min
2	gi|504711273	peptidase S1 [Burkholderia cepacia]	176	60079	22	5	5	2	13.4	5.61	514	1	0	0	632.3061	1262.5977	2	1262.5931	0.0045	0	75.28	0.0018	K	YLFGESYGTAR	S			Cmpd 378, AutoMSn(632.3061), 19.1 min
2	gi|504711273	peptidase S1 [Burkholderia cepacia]	176	60079	22	5	5	2	13.4	5.61	515	1	0	0	632.3062	1262.5978	2	1262.5931	0.0046	0	68.67	0.0081	K	YLFGESYGTAR	S			Cmpd 375, AutoMSn(632.3062), 19.0 min
2	gi|504711273	peptidase S1 [Burkholderia cepacia]	176	60079	22	5	5	2	13.4	5.61	516	1	0	0	632.3079	1262.6013	2	1262.5931	0.0081	0	58.9	0.077	K	YLFGESYGTAR	S			Cmpd 381, AutoMSn(632.3079), 19.1 min
2	gi|504711273	peptidase S1 [Burkholderia cepacia]	176	60079	22	5	5	2	13.4	5.61	667	1	0	0	562.6007	1684.7804	3	1684.7668	0.0136	0	40.1	5.1	R	FYPSGHMVYLDGGSR	T			Cmpd 354, AutoMSn(562.6007), 18.5 min
2	gi|504711273	peptidase S1 [Burkholderia cepacia]	176	60079	22	5	5	2	13.4	5.61	668	1	0	0	562.6009	1684.7809	3	1684.7668	0.0141	0	42.36	3.1	R	FYPSGHMVYLDGGSR	T			Cmpd 351, AutoMSn(562.6009), 18.5 min
2	gi|504711273	peptidase S1 [Burkholderia cepacia]	176	60079	22	5	5	2	13.4	5.61	671	9	0	0	851.3935	1700.7725	2	1700.7617	0.0108	0	17.36	9.80E+02	R	FYPSGHMVYLDGGSR	T	Oxidation (M)	0.000000200000000.0	Cmpd 281, AutoMSn(851.3935), 16.8 min
2	gi|504711273	peptidase S1 [Burkholderia cepacia]	176	60079	22	5	5	2	13.4	5.61	672	1	0	0	567.9324	1700.7755	3	1700.7617	0.0138	0	30.77	45	R	FYPSGHMVYLDGGSR	T	Oxidation (M)	0.000000200000000.0	Cmpd 279, AutoMSn(567.9324), 16.8 min
2	gi|504711273	peptidase S1 [Burkholderia cepacia]	176	60079	22	5	5	2	13.4	5.61	673	1	0	0	567.9327	1700.7763	3	1700.7617	0.0146	0	51.02	0.42	R	FYPSGHMVYLDGGSR	T	Oxidation (M)	0.000000200000000.0	Cmpd 276, AutoMSn(567.9327), 16.7 min
2	gi|504711273	peptidase S1 [Burkholderia cepacia]	176	60079	22	5	5	2	13.4	5.61	674	1	0	0	567.9338	1700.7797	3	1700.7617	0.018	0	47.97	0.85	R	FYPSGHMVYLDGGSR	T	Oxidation (M)	0.000000200000000.0	Cmpd 282, AutoMSn(567.9338), 16.8 min
2	gi|504711273	peptidase S1 [Burkholderia cepacia]	176	60079	22	5	5	2	13.4	5.61	747	1	0	0	679.827	2036.4592	3	2037.0068	-0.5476	0	21.19	6.60E+02	R	QAGNPVGALPTAAADAWYHK	K			Cmpd 461, AutoMSn(679.8270), 20.9 min
2	gi|504711273	peptidase S1 [Burkholderia cepacia]	176	60079	22	5	5	2	13.4	5.61	748	1	0	0	680.0139	2037.0198	3	2037.0068	0.0129	0	25.55	1.20E+02	R	QAGNPVGALPTAAADAWYHK	K			Cmpd 465, AutoMSn(680.0139), 21.0 min
2	gi|504711273	peptidase S1 [Burkholderia cepacia]	176	60079	22	5	5	2	13.4	5.61	749	1	0	0	680.0143	2037.021	3	2037.0068	0.0142	0	23.59	1.90E+02	R	QAGNPVGALPTAAADAWYHK	K			Cmpd 464, AutoMSn(680.0143), 21.0 min
2	gi|504711273	peptidase S1 [Burkholderia cepacia]	176	60079	22	5	5	2	13.4	5.61	781	7	0	1	763.4002	2287.1787	3	2287.1849	-0.0062	0	23.67	1.80E+02	K	LGVTPAPTDLGAFVEEVAQFAR	T			Cmpd 878, AutoMSn(763.4002), 31.6 min
2	gi|504711273	peptidase S1 [Burkholderia cepacia]	176	60079	22	5	5	2	13.4	5.61	784	3	0	1	1144.6069	2287.1993	2	2287.1849	0.0144	0	20.29	4.00E+02	K	LGVTPAPTDLGAFVEEVAQFAR	T			Cmpd 904, AutoMSn(1144.6069), 32.2 min
2	gi|504711273	peptidase S1 [Burkholderia cepacia]	176	60079	22	5	5	2	13.4	5.61	786	2	0	1	763.4077	2287.2012	3	2287.1849	0.0164	0	44.09	1.7	K	LGVTPAPTDLGAFVEEVAQFAR	T			Cmpd 880, AutoMSn(763.4077), 31.6 min
2	gi|504711273	peptidase S1 [Burkholderia cepacia]	176	60079	22	5	5	2	13.4	5.61	787	2	0	1	763.4092	2287.2058	3	2287.1849	0.0209	0	55.7	0.11	K	LGVTPAPTDLGAFVEEVAQFAR	T			Cmpd 883, AutoMSn(763.4092), 31.7 min
2	gi|504711273	peptidase S1 [Burkholderia cepacia]	176	60079	22	5	5	2	13.4	5.61	788	1	0	1	763.4095	2287.2066	3	2287.1849	0.0217	0	69.24	0.0051	K	LGVTPAPTDLGAFVEEVAQFAR	T			Cmpd 902, AutoMSn(763.4095), 32.2 min
2	gi|504711273	peptidase S1 [Burkholderia cepacia]	176	60079	22	5	5	2	13.4	5.61	790	2	0	1	763.41	2287.2081	3	2287.1849	0.0233	0	61.78	0.028	K	LGVTPAPTDLGAFVEEVAQFAR	T			Cmpd 897, AutoMSn(763.4100), 32.0 min
2	gi|504711273	peptidase S1 [Burkholderia cepacia]	176	60079	22	5	5	2	13.4	5.61	791	2	0	1	763.4113	2287.2121	3	2287.1849	0.0273	0	90.61	3.70E-05	K	LGVTPAPTDLGAFVEEVAQFAR	T			Cmpd 898, AutoMSn(763.4113), 32.1 min	emPAI	0.24
3	gi|493818940	peptidase S1 [Burkholderia dolosa]	118	60108	19	2	5	1	12	5.51	271	1	0	0	420.7201	839.4257	2	839.4211	0.0046	0	49.13	0.62	R	SCVLAYK	L	Carbamidomethyl (C)	0.0100000.0	Cmpd 203, AutoMSn(420.7201), 15.0 min
3	gi|493818940	peptidase S1 [Burkholderia dolosa]	118	60108	19	2	5	1	12	5.51	49	1	0	0	420.7205	839.4265	2	839.4211	0.0054	0	55.79	0.78	R	SCVLAYK	L	Carbamidomethyl (C)	0.0100000.0	Cmpd 199, AutoMSn(420.7205), 14.9 min
3	gi|493818940	peptidase S1 [Burkholderia dolosa]	118	60108	19	2	5	1	12	5.51	272	1	0	0	420.7206	839.4267	2	839.4211	0.0056	0	36.41	12	R	SCVLAYK	L	Carbamidomethyl (C)	0.0100000.0	Cmpd 200, AutoMSn(420.7207), 15.0 min
3	gi|493818940	peptidase S1 [Burkholderia dolosa]	118	60108	19	2	5	1	12	5.51	514	1	0	0	632.3061	1262.5977	2	1262.5931	0.0045	0	75.28	0.0018	K	YLFGESYGTAR	S			Cmpd 378, AutoMSn(632.3061), 19.1 min
3	gi|493818940	peptidase S1 [Burkholderia dolosa]	118	60108	19	2	5	1	12	5.51	515	1	0	0	632.3062	1262.5978	2	1262.5931	0.0046	0	68.67	0.0081	K	YLFGESYGTAR	S			Cmpd 375, AutoMSn(632.3062), 19.0 min
3	gi|493818940	peptidase S1 [Burkholderia dolosa]	118	60108	19	2	5	1	12	5.51	516	1	0	0	632.3079	1262.6013	2	1262.5931	0.0081	0	58.9	0.077	K	YLFGESYGTAR	S			Cmpd 381, AutoMSn(632.3079), 19.1 min
3	gi|493818940	peptidase S1 [Burkholderia dolosa]	118	60108	19	2	5	1	12	5.51	618	1	0	0	747.8461	1493.6776	2	1493.6787	-0.001	0	33.26	26	R	DFWGVDQDANSLK	Q			Cmpd 523, AutoMSn(747.8461), 22.3 min
3	gi|493818940	peptidase S1 [Burkholderia dolosa]	118	60108	19	2	5	1	12	5.51	619	2	0	0	747.8489	1493.6832	2	1493.6787	0.0045	0	31.64	37	R	DFWGVDQDANSLK	Q			Cmpd 525, AutoMSn(747.8489), 22.4 min
3	gi|493818940	peptidase S1 [Burkholderia dolosa]	118	60108	19	2	5	1	12	5.51	620	2	0	0	498.9018	1493.6836	3	1493.6787	0.0049	0	23.32	2.50E+02	R	DFWGVDQDANSLK	Q			Cmpd 526, AutoMSn(498.9018), 22.4 min
3	gi|493818940	peptidase S1 [Burkholderia dolosa]	118	60108	19	2	5	1	12	5.51	622	1	0	0	747.8494	1493.6842	2	1493.6787	0.0055	0	51.72	0.36	R	DFWGVDQDANSLK	Q			Cmpd 527, AutoMSn(747.8494), 22.4 min
3	gi|493818940	peptidase S1 [Burkholderia dolosa]	118	60108	19	2	5	1	12	5.51	667	1	0	0	562.6007	1684.7804	3	1684.7668	0.0136	0	40.1	5.1	R	FYPSGHMVYLDGGSR	T			Cmpd 354, AutoMSn(562.6007), 18.5 min
3	gi|493818940	peptidase S1 [Burkholderia dolosa]	118	60108	19	2	5	1	12	5.51	668	1	0	0	562.6009	1684.7809	3	1684.7668	0.0141	0	42.36	3.1	R	FYPSGHMVYLDGGSR	T			Cmpd 351, AutoMSn(562.6009), 18.5 min
3	gi|493818940	peptidase S1 [Burkholderia dolosa]	118	60108	19	2	5	1	12	5.51	671	9	0	0	851.3935	1700.7725	2	1700.7617	0.0108	0	17.36	9.80E+02	R	FYPSGHMVYLDGGSR	T	Oxidation (M)	0.000000200000000.0	Cmpd 281, AutoMSn(851.3935), 16.8 min
3	gi|493818940	peptidase S1 [Burkholderia dolosa]	118	60108	19	2	5	1	12	5.51	672	1	0	0	567.9324	1700.7755	3	1700.7617	0.0138	0	30.77	45	R	FYPSGHMVYLDGGSR	T	Oxidation (M)	0.000000200000000.0	Cmpd 279, AutoMSn(567.9324), 16.8 min
3	gi|493818940	peptidase S1 [Burkholderia dolosa]	118	60108	19	2	5	1	12	5.51	673	1	0	0	567.9327	1700.7763	3	1700.7617	0.0146	0	51.02	0.42	R	FYPSGHMVYLDGGSR	T	Oxidation (M)	0.000000200000000.0	Cmpd 276, AutoMSn(567.9327), 16.7 min
3	gi|493818940	peptidase S1 [Burkholderia dolosa]	118	60108	19	2	5	1	12	5.51	674	1	0	0	567.9338	1700.7797	3	1700.7617	0.018	0	47.97	0.85	R	FYPSGHMVYLDGGSR	T	Oxidation (M)	0.000000200000000.0	Cmpd 282, AutoMSn(567.9338), 16.8 min
3	gi|493818940	peptidase S1 [Burkholderia dolosa]	118	60108	19	2	5	1	12	5.51	805	1	0	0	786.7427	2357.2063	3	2357.1863	0.02	0	58.74	0.055	K	LHEDGVDLNGITLQSSILDYR	Q			Cmpd 605, AutoMSn(786.7427), 24.2 min
3	gi|493818940	peptidase S1 [Burkholderia dolosa]	118	60108	19	2	5	1	12	5.51	806	1	0	0	786.7432	2357.2078	3	2357.1863	0.0215	0	55.75	0.11	K	LHEDGVDLNGITLQSSILDYR	Q			Cmpd 608, AutoMSn(786.7432), 24.3 min
3	gi|493818940	peptidase S1 [Burkholderia dolosa]	118	60108	19	2	5	1	12	5.51	807	1	0	0	786.7449	2357.2129	3	2357.1863	0.0266	0	52.53	0.23	K	LHEDGVDLNGITLQSSILDYR	Q			Cmpd 611, AutoMSn(786.7449), 24.3 min	emPAI	0.24
4	gi|654266321	peptidase S1 [Burkholderia cepacia]	118	59969	19	2	5	1	11.8	5.87	271	1	0	0	420.7201	839.4257	2	839.4211	0.0046	0	49.13	0.62	R	SCVLAYK	L	Carbamidomethyl (C)	0.0100000.0	Cmpd 203, AutoMSn(420.7201), 15.0 min
4	gi|654266321	peptidase S1 [Burkholderia cepacia]	118	59969	19	2	5	1	11.8	5.87	49	1	0	0	420.7205	839.4265	2	839.4211	0.0054	0	55.79	0.78	R	SCVLAYK	L	Carbamidomethyl (C)	0.0100000.0	Cmpd 199, AutoMSn(420.7205), 14.9 min
4	gi|654266321	peptidase S1 [Burkholderia cepacia]	118	59969	19	2	5	1	11.8	5.87	272	1	0	0	420.7206	839.4267	2	839.4211	0.0056	0	36.41	12	R	SCVLAYK	L	Carbamidomethyl (C)	0.0100000.0	Cmpd 200, AutoMSn(420.7207), 15.0 min
4	gi|654266321	peptidase S1 [Burkholderia cepacia]	118	59969	19	2	5	1	11.8	5.87	514	1	0	0	632.3061	1262.5977	2	1262.5931	0.0045	0	75.28	0.0018	K	YLFGESYGTAR	S			Cmpd 378, AutoMSn(632.3061), 19.1 min
4	gi|654266321	peptidase S1 [Burkholderia cepacia]	118	59969	19	2	5	1	11.8	5.87	515	1	0	0	632.3062	1262.5978	2	1262.5931	0.0046	0	68.67	0.0081	K	YLFGESYGTAR	S			Cmpd 375, AutoMSn(632.3062), 19.0 min
4	gi|654266321	peptidase S1 [Burkholderia cepacia]	118	59969	19	2	5	1	11.8	5.87	516	1	0	0	632.3079	1262.6013	2	1262.5931	0.0081	0	58.9	0.077	K	YLFGESYGTAR	S			Cmpd 381, AutoMSn(632.3079), 19.1 min
4	gi|654266321	peptidase S1 [Burkholderia cepacia]	118	59969	19	2	5	1	11.8	5.87	618	1	0	0	747.8461	1493.6776	2	1493.6787	-0.001	0	33.26	26	R	DFWGVDQDANSLK	Q			Cmpd 523, AutoMSn(747.8461), 22.3 min
4	gi|654266321	peptidase S1 [Burkholderia cepacia]	118	59969	19	2	5	1	11.8	5.87	619	2	0	0	747.8489	1493.6832	2	1493.6787	0.0045	0	31.64	37	R	DFWGVDQDANSLK	Q			Cmpd 525, AutoMSn(747.8489), 22.4 min
4	gi|654266321	peptidase S1 [Burkholderia cepacia]	118	59969	19	2	5	1	11.8	5.87	620	2	0	0	498.9018	1493.6836	3	1493.6787	0.0049	0	23.32	2.50E+02	R	DFWGVDQDANSLK	Q			Cmpd 526, AutoMSn(498.9018), 22.4 min
4	gi|654266321	peptidase S1 [Burkholderia cepacia]	118	59969	19	2	5	1	11.8	5.87	622	1	0	0	747.8494	1493.6842	2	1493.6787	0.0055	0	51.72	0.36	R	DFWGVDQDANSLK	Q			Cmpd 527, AutoMSn(747.8494), 22.4 min
4	gi|654266321	peptidase S1 [Burkholderia cepacia]	118	59969	19	2	5	1	11.8	5.87	667	1	0	0	562.6007	1684.7804	3	1684.7668	0.0136	0	40.1	5.1	R	FYPSGHMVYLDGGSR	T			Cmpd 354, AutoMSn(562.6007), 18.5 min
4	gi|654266321	peptidase S1 [Burkholderia cepacia]	118	59969	19	2	5	1	11.8	5.87	668	1	0	0	562.6009	1684.7809	3	1684.7668	0.0141	0	42.36	3.1	R	FYPSGHMVYLDGGSR	T			Cmpd 351, AutoMSn(562.6009), 18.5 min
4	gi|654266321	peptidase S1 [Burkholderia cepacia]	118	59969	19	2	5	1	11.8	5.87	671	9	0	0	851.3935	1700.7725	2	1700.7617	0.0108	0	17.36	9.80E+02	R	FYPSGHMVYLDGGSR	T	Oxidation (M)	0.000000200000000.0	Cmpd 281, AutoMSn(851.3935), 16.8 min
4	gi|654266321	peptidase S1 [Burkholderia cepacia]	118	59969	19	2	5	1	11.8	5.87	672	1	0	0	567.9324	1700.7755	3	1700.7617	0.0138	0	30.77	45	R	FYPSGHMVYLDGGSR	T	Oxidation (M)	0.000000200000000.0	Cmpd 279, AutoMSn(567.9324), 16.8 min
4	gi|654266321	peptidase S1 [Burkholderia cepacia]	118	59969	19	2	5	1	11.8	5.87	673	1	0	0	567.9327	1700.7763	3	1700.7617	0.0146	0	51.02	0.42	R	FYPSGHMVYLDGGSR	T	Oxidation (M)	0.000000200000000.0	Cmpd 276, AutoMSn(567.9327), 16.7 min
4	gi|654266321	peptidase S1 [Burkholderia cepacia]	118	59969	19	2	5	1	11.8	5.87	674	1	0	0	567.9338	1700.7797	3	1700.7617	0.018	0	47.97	0.85	R	FYPSGHMVYLDGGSR	T	Oxidation (M)	0.000000200000000.0	Cmpd 282, AutoMSn(567.9338), 16.8 min
4	gi|654266321	peptidase S1 [Burkholderia cepacia]	118	59969	19	2	5	1	11.8	5.87	747	1	0	0	679.827	2036.4592	3	2037.0068	-0.5476	0	21.19	6.60E+02	R	QAGNPVGALPTAAADAWYHK	K			Cmpd 461, AutoMSn(679.8270), 20.9 min
4	gi|654266321	peptidase S1 [Burkholderia cepacia]	118	59969	19	2	5	1	11.8	5.87	748	1	0	0	680.0139	2037.0198	3	2037.0068	0.0129	0	25.55	1.20E+02	R	QAGNPVGALPTAAADAWYHK	K			Cmpd 465, AutoMSn(680.0139), 21.0 min
4	gi|654266321	peptidase S1 [Burkholderia cepacia]	118	59969	19	2	5	1	11.8	5.87	749	1	0	0	680.0143	2037.021	3	2037.0068	0.0142	0	23.59	1.90E+02	R	QAGNPVGALPTAAADAWYHK	K			Cmpd 464, AutoMSn(680.0143), 21.0 min	emPAI	0.24
5	gi|496202385	peptidase S1 [Burkholderia sp. H160]	116	59827	15	2	4	1	11.6	5.57	514	1	0	0	632.3061	1262.5977	2	1262.5931	0.0045	0	75.28	0.0018	K	YLFGESYGTAR	S			Cmpd 378, AutoMSn(632.3061), 19.1 min
5	gi|496202385	peptidase S1 [Burkholderia sp. H160]	116	59827	15	2	4	1	11.6	5.57	515	1	0	0	632.3062	1262.5978	2	1262.5931	0.0046	0	68.67	0.0081	K	YLFGESYGTAR	S			Cmpd 375, AutoMSn(632.3062), 19.0 min
5	gi|496202385	peptidase S1 [Burkholderia sp. H160]	116	59827	15	2	4	1	11.6	5.57	516	1	0	0	632.3079	1262.6013	2	1262.5931	0.0081	0	58.9	0.077	K	YLFGESYGTAR	S			Cmpd 381, AutoMSn(632.3079), 19.1 min
5	gi|496202385	peptidase S1 [Burkholderia sp. H160]	116	59827	15	2	4	1	11.6	5.57	667	1	0	0	562.6007	1684.7804	3	1684.7668	0.0136	0	40.1	5.1	R	FYPSGHMVYLDGGSR	T			Cmpd 354, AutoMSn(562.6007), 18.5 min
5	gi|496202385	peptidase S1 [Burkholderia sp. H160]	116	59827	15	2	4	1	11.6	5.57	668	1	0	0	562.6009	1684.7809	3	1684.7668	0.0141	0	42.36	3.1	R	FYPSGHMVYLDGGSR	T			Cmpd 351, AutoMSn(562.6009), 18.5 min
5	gi|496202385	peptidase S1 [Burkholderia sp. H160]	116	59827	15	2	4	1	11.6	5.57	671	9	0	0	851.3935	1700.7725	2	1700.7617	0.0108	0	17.36	9.80E+02	R	FYPSGHMVYLDGGSR	T	Oxidation (M)	0.000000200000000.0	Cmpd 281, AutoMSn(851.3935), 16.8 min
5	gi|496202385	peptidase S1 [Burkholderia sp. H160]	116	59827	15	2	4	1	11.6	5.57	672	1	0	0	567.9324	1700.7755	3	1700.7617	0.0138	0	30.77	45	R	FYPSGHMVYLDGGSR	T	Oxidation (M)	0.000000200000000.0	Cmpd 279, AutoMSn(567.9324), 16.8 min
5	gi|496202385	peptidase S1 [Burkholderia sp. H160]	116	59827	15	2	4	1	11.6	5.57	673	1	0	0	567.9327	1700.7763	3	1700.7617	0.0146	0	51.02	0.42	R	FYPSGHMVYLDGGSR	T	Oxidation (M)	0.000000200000000.0	Cmpd 276, AutoMSn(567.9327), 16.7 min
5	gi|496202385	peptidase S1 [Burkholderia sp. H160]	116	59827	15	2	4	1	11.6	5.57	674	1	0	0	567.9338	1700.7797	3	1700.7617	0.018	0	47.97	0.85	R	FYPSGHMVYLDGGSR	T	Oxidation (M)	0.000000200000000.0	Cmpd 282, AutoMSn(567.9338), 16.8 min
5	gi|496202385	peptidase S1 [Burkholderia sp. H160]	116	59827	15	2	4	1	11.6	5.57	702	1	0	0	919.4184	1836.8222	2	1836.8166	0.0056	0	40.3	4.7	K	YTSNSSFTDLNDQAFK	Y			Cmpd 418, AutoMSn(919.4184), 19.9 min
5	gi|496202385	peptidase S1 [Burkholderia sp. H160]	116	59827	15	2	4	1	11.6	5.57	703	1	0	0	919.4191	1836.8237	2	1836.8166	0.0071	0	29.76	54	K	YTSNSSFTDLNDQAFK	Y			Cmpd 421, AutoMSn(919.4191), 20.0 min
5	gi|496202385	peptidase S1 [Burkholderia sp. H160]	116	59827	15	2	4	1	11.6	5.57	704	1	0	0	613.2855	1836.8348	3	1836.8166	0.0182	0	40.03	5	K	YTSNSSFTDLNDQAFK	Y			Cmpd 420, AutoMSn(613.2855), 20.0 min
5	gi|496202385	peptidase S1 [Burkholderia sp. H160]	116	59827	15	2	4	1	11.6	5.57	705	1	0	0	613.2858	1836.8355	3	1836.8166	0.0188	0	44.16	1.9	K	YTSNSSFTDLNDQAFK	Y			Cmpd 417, AutoMSn(613.2858), 19.9 min
5	gi|496202385	peptidase S1 [Burkholderia sp. H160]	116	59827	15	2	4	1	11.6	5.57	158	2	0	0	613.2896	1836.847	3	1836.8166	0.0304	0	23.43	6.60E+02	K	YTSNSSFTDLNDQAFK	Y			Cmpd 415, AutoMSn(613.2896), 19.9 min
5	gi|496202385	peptidase S1 [Burkholderia sp. H160]	116	59827	15	2	4	1	11.6	5.57	799	8	1	1	782.4188	2344.2345	3	2344.2175	0.0169	0	30.77	35	K	LGVAPRPTDLGTFAEEVAQFAR	T			Cmpd 911, AutoMSn(782.4188), 32.4 min	emPAI	0.24
6	gi|490662511	MULTISPECIES: acyl-CoA dehydrogenase [Burkholderia]	61	63642	11	1	8	1	20.6	5.52	243	1	1	1	386.24	770.4653	2	770.465	0.0003	0	19.64	7.00E+02	K	ALIGEIR	Q			Cmpd 309, AutoMSn(386.2400), 17.4 min
6	gi|490662511	MULTISPECIES: acyl-CoA dehydrogenase [Burkholderia]	61	63642	11	1	8	1	20.6	5.52	552	1	1	1	668.8385	1335.6624	2	1335.6605	0.0019	0	60.54	0.05	R	FGVGMQGIGVAER	A	Oxidation (M)	0.0000200000000.0	Cmpd 345, AutoMSn(668.8385), 18.3 min
6	gi|490662511	MULTISPECIES: acyl-CoA dehydrogenase [Burkholderia]	61	63642	11	1	8	1	20.6	5.52	553	1	1	1	668.8388	1335.6631	2	1335.6605	0.0026	0	59.16	0.068	R	FGVGMQGIGVAER	A	Oxidation (M)	0.0000200000000.0	Cmpd 348, AutoMSn(668.8389), 18.4 min
6	gi|490662511	MULTISPECIES: acyl-CoA dehydrogenase [Burkholderia]	61	63642	11	1	8	1	20.6	5.52	554	1	1	1	668.842	1335.6693	2	1335.6605	0.0088	0	49.08	0.69	R	FGVGMQGIGVAER	A	Oxidation (M)	0.0000200000000.0	Cmpd 344, AutoMSn(668.8420), 18.3 min
6	gi|490662511	MULTISPECIES: acyl-CoA dehydrogenase [Burkholderia]	61	63642	11	1	8	1	20.6	5.52	563	4	1	1	684.8281	1367.6416	2	1367.6358	0.0058	0	15.8	1.50E+03	K	GGQGVFALTEDQF	-			Cmpd 693, AutoMSn(684.8281), 26.2 min
6	gi|490662511	MULTISPECIES: acyl-CoA dehydrogenase [Burkholderia]	61	63642	11	1	8	1	20.6	5.52	632	1	1	1	518.2693	1551.7861	3	1551.7682	0.0179	1	35.53	15	K	DGAVTATPGFKDAFR	Q			Cmpd 367, AutoMSn(518.2693), 18.8 min
6	gi|490662511	MULTISPECIES: acyl-CoA dehydrogenase [Burkholderia]	61	63642	11	1	8	1	20.6	5.52	635	1	1	1	519.9636	1556.8688	3	1556.8536	0.0153	1	42.56	3.1	K	QSVTIIHHPDVRR	M			Cmpd 126, AutoMSn(519.9635), 13.3 min
6	gi|490662511	MULTISPECIES: acyl-CoA dehydrogenase [Burkholderia]	61	63642	11	1	8	1	20.6	5.52	640	3	1	1	535.9383	1604.793	3	1604.7808	0.0123	0	31.77	35	R	ALSYVAAAHSDHAHR	A			Cmpd 79, AutoMSn(535.9383), 12.1 min
6	gi|490662511	MULTISPECIES: acyl-CoA dehydrogenase [Burkholderia]	61	63642	11	1	8	1	20.6	5.52	641	1	1	1	535.9417	1604.8033	3	1604.7808	0.0225	0	36.17	13	R	ALSYVAAAHSDHAHR	A			Cmpd 76, AutoMSn(535.9417), 12.1 min
6	gi|490662511	MULTISPECIES: acyl-CoA dehydrogenase [Burkholderia]	61	63642	11	1	8	1	20.6	5.52	701	8	1	1	611.3002	1830.8789	3	1830.857	0.0218	0	21.85	3.20E+02	R	QTAEALGAHDGPAFTAMK	T	Oxidation (M)	0.000000000000000020.0	Cmpd 244, AutoMSn(611.3002), 16.0 min
6	gi|490662511	MULTISPECIES: acyl-CoA dehydrogenase [Burkholderia]	61	63642	11	1	8	1	20.6	5.52	865	1	1	1	983.2149	2946.6228	3	2946.5855	0.0372	1	35.34	12	R	ALSAVVDFVVANVKGDPNAVFAGSVPYLK	L			Cmpd 780, AutoMSn(983.2149), 28.4 min	emPAI	0.05
7	gi|453052309	Aldo-keto reductase [Streptomyces mobaraensis NBRC 13819 = DSM 40847]	56	35459	1	0	1	0	2.1	5.15	259	1	1	1	404.2053	806.3961	2	806.3923	0.0038	0	55.79	0.19	R	LAADDFR	G			Cmpd 232, AutoMSn(404.2053), 15.7 min	emPAI	0.09
8	gi|491372154	dihydrolipoamide acetyltransferase [Enterococcus casseliflavus]	56	57909	2	0	1	0	1.3	4.68	257	1	1	1	404.2029	806.3913	2	806.3592	0.0321	0	42.27	4.2	K	LAADDMR	N	Oxidation (M)	0.0000020.0	Cmpd 235, AutoMSn(404.2029), 15.8 min
8	gi|491372154	dihydrolipoamide acetyltransferase [Enterococcus casseliflavus]	56	57909	2	0	1	0	1.3	4.68	259	1	0	1	404.2053	806.3961	2	806.3592	0.0368	0	55.79	0.19	K	LAADDMR	N	Oxidation (M)	0.0000020.0	Cmpd 232, AutoMSn(404.2053), 15.7 min	emPAI	0.06
9	gi|499719774	hypothetical protein [Hahella chejuensis]	56	36547	2	0	1	0	2.1	6.47	258	1	1	1	404.2048	806.3951	2	806.3923	0.0028	0	42.59	3.9	K	IAADDFR	A			Cmpd 229, AutoMSn(404.2048), 15.6 min
9	gi|499719774	hypothetical protein [Hahella chejuensis]	56	36547	2	0	1	0	2.1	6.47	259	1	0	1	404.2053	806.3961	2	806.3923	0.0038	0	55.79	0.19	K	IAADDFR	A			Cmpd 232, AutoMSn(404.2053), 15.7 min	emPAI	0.09
10	gi|653213821	hypothetical protein [Lachnospiraceae bacterium NC2004]	56	191383	3	0	1	0	0.4	5.52	257	1	0	1	404.2029	806.3913	2	806.3592	0.0321	0	42.27	4.2	K	IAADDMR	D	Oxidation (M)	0.0000020.0	Cmpd 235, AutoMSn(404.2029), 15.8 min
10	gi|653213821	hypothetical protein [Lachnospiraceae bacterium NC2004]	56	191383	3	0	1	0	0.4	5.52	258	1	0	1	404.2048	806.3951	2	806.3592	0.0358	0	42.59	3.9	K	IAADDMR	D	Oxidation (M)	0.0000020.0	Cmpd 229, AutoMSn(404.2048), 15.6 min
10	gi|653213821	hypothetical protein [Lachnospiraceae bacterium NC2004]	56	191383	3	0	1	0	0.4	5.52	259	1	0	1	404.2053	806.3961	2	806.3592	0.0368	0	55.79	0.19	K	IAADDMR	D	Oxidation (M)	0.0000020.0	Cmpd 232, AutoMSn(404.2053), 15.7 min	emPAI	0.02
11	gi|431789170	Exonuclease SbcC [Yersinia enterocolitica IP 10393]	52	96748	1	0	1	0	1.1	5.36	416	1	1	1	530.7884	1059.5621	2	1059.5448	0.0174	0	51.58	0.48	K	TIIDIDNEK	D			Cmpd 379, AutoMSn(530.7883), 19.1 min	emPAI	0.03
12	gi|501555130	phenylalanyl-tRNA synthetase subunit beta [Rhizobium leguminosarum]	52	86643	1	0	1	0	1.1	5.36	416	1	0	1	530.7884	1059.5621	2	1059.5448	0.0173	0	51.58	0.48	K	LTLDLDDQK	L			Cmpd 379, AutoMSn(530.7883), 19.1 min	emPAI	0.04
13	gi|505057619	imidazoleglycerol-phosphate dehydratase [Singulisphaera acidiphila]	52	22264	1	0	1	0	5	6.12	416	1	0	1	530.7884	1059.5621	2	1059.556	0.0061	0	51.58	0.48	R	LTLDLDGTGR	A			Cmpd 379, AutoMSn(530.7883), 19.1 min	emPAI	0.15
14	gi|564795808	Penicillin-binding protein 2 [Parcubacteria bacterium RAAC4_OD1_1]	52	63242	1	0	1	0	1.6	6.19	416	1	0	1	530.7884	1059.5621	2	1059.5812	-0.019	1	51.58	0.48	K	TILDIDKDK	M			Cmpd 379, AutoMSn(530.7883), 19.1 min	emPAI	0.05
15	gi|737790020	imidazoleglycerol-phosphate dehydratase [Flexibacter roseolus]	52	43166	1	0	1	0	2.6	5.58	416	1	0	1	530.7884	1059.5621	2	1059.5448	0.0173	0	51.58	0.48	R	LTLDLDGEGK	A			Cmpd 379, AutoMSn(530.7883), 19.1 min	emPAI	0.08
16	gi|548131831	hypothetical protein [Dialister sp. CAG:357]	51	44514	2	0	1	0	2.8	5.16	529	6	1	1	651.8615	1301.7084	2	1301.6939	0.0145	1	21.46	4.40E+02	K	LSDLDTVIDRR	G			Cmpd 684, AutoMSn(651.8615), 26.0 min
16	gi|548131831	hypothetical protein [Dialister sp. CAG:357]	51	44514	2	0	1	0	2.8	5.16	530	1	1	1	651.864	1301.7135	2	1301.6939	0.0196	1	51.01	0.49	K	LSDLDTVIDRR	G			Cmpd 687, AutoMSn(651.8640), 26.1 min	emPAI	0.07
17	gi|652519492	transposase [Gramella portivictoriae]	47	47873	1	0	1	0	5.4	9.89	311	1	1	1	893.0656	2676.1748	3	2676.3735	-0.1987	1	47.2	5.1	K	NYFLISYLLFGMSFIDMAFLKK	K	Oxidation (M)	0.0000000000000000200000.0	Cmpd 598, AutoMSn(893.0656), 24.0 min	emPAI	0.07
18	gi|446587855	hypothetical protein [Bacillus cereus]	46	7163	1	0	1	0	26.2	8.09	730	1	0	1	636.9931	1907.9574	3	1908	-0.0426	1	45.81	1.2	K	TTLNIHTLNMHRTNVK	K	Oxidation (M)	0.0000000002000000.0	Cmpd 222, AutoMSn(636.9931), 15.4 min	emPAI	0.49
19	gi|385368125	serine protease [Burkholderia pseudomallei 354e]	45	114528	12	0	6	0	9.9	6.21	419	2	1	1	531.282	1060.5493	2	1060.5513	-0.002	0	34.08	26	R	AAVTGTTADVR	V			Cmpd 124, AutoMSn(531.2819), 13.2 min
19	gi|385368125	serine protease [Burkholderia pseudomallei 354e]	45	114528	12	0	6	0	9.9	6.21	422	1	1	1	531.2858	1060.557	2	1060.5513	0.0057	0	39.69	7.3	R	AAVTGTTADVR	V			Cmpd 125, AutoMSn(531.2858), 13.3 min
19	gi|385368125	serine protease [Burkholderia pseudomallei 354e]	45	114528	12	0	6	0	9.9	6.21	547	1	1	1	666.8271	1331.6397	2	1331.6397	0	0	26.73	1.30E+02	K	YFAEAYDALAAK	G			Cmpd 444, AutoMSn(666.8271), 20.6 min
19	gi|385368125	serine protease [Burkholderia pseudomallei 354e]	45	114528	12	0	6	0	9.9	6.21	548	6	1	1	666.8312	1331.6478	2	1331.6397	0.0081	0	27.27	1.10E+02	K	YFAEAYDALAAK	G			Cmpd 448, AutoMSn(666.8312), 20.6 min
19	gi|385368125	serine protease [Burkholderia pseudomallei 354e]	45	114528	12	0	6	0	9.9	6.21	594	1	1	1	489.2505	1464.7297	3	1464.7249	0.0048	1	29.38	61	R	FGVSDPKFPASDAK	Y			Cmpd 299, AutoMSn(489.2505), 17.2 min
19	gi|385368125	serine protease [Burkholderia pseudomallei 354e]	45	114528	12	0	6	0	9.9	6.21	595	1	1	1	489.2517	1464.7332	3	1464.7249	0.0083	1	45.1	1.6	R	FGVSDPKFPASDAK	Y			Cmpd 300, AutoMSn(489.2517), 17.2 min
19	gi|385368125	serine protease [Burkholderia pseudomallei 354e]	45	114528	12	0	6	0	9.9	6.21	760	1	1	1	700.9988	2099.9745	3	2099.9508	0.0237	0	35.41	13	R	DGVINNFSSGNTGYDNASLR	G			Cmpd 449, AutoMSn(700.9988), 20.7 min
19	gi|385368125	serine protease [Burkholderia pseudomallei 354e]	45	114528	12	0	6	0	9.9	6.21	761	2	1	1	700.9992	2099.9757	3	2099.9508	0.0249	0	24.71	1.60E+02	R	DGVINNFSSGNTGYDNASLR	G			Cmpd 451, AutoMSn(700.9992), 20.7 min
19	gi|385368125	serine protease [Burkholderia pseudomallei 354e]	45	114528	12	0	6	0	9.9	6.21	825	1	1	1	811.778	2432.3122	3	2432.3024	0.0098	0	40.67	3.7	R	VASGFASLGGTSGSVAVGALGVAAITGR	T			Cmpd 685, AutoMSn(811.7780), 26.0 min
19	gi|385368125	serine protease [Burkholderia pseudomallei 354e]	45	114528	12	0	6	0	9.9	6.21	826	4	1	1	811.7803	2432.3191	3	2432.3024	0.0168	0	21.12	3.40E+02	R	VASGFASLGGTSGSVAVGALGVAAITGR	T			Cmpd 681, AutoMSn(811.7803), 25.9 min
19	gi|385368125	serine protease [Burkholderia pseudomallei 354e]	45	114528	12	0	6	0	9.9	6.21	827	3	1	1	811.7809	2432.321	3	2432.3024	0.0186	0	24.97	1.40E+02	R	VASGFASLGGTSGSVAVGALGVAAITGR	T			Cmpd 678, AutoMSn(811.7809), 25.9 min
19	gi|385368125	serine protease [Burkholderia pseudomallei 354e]	45	114528	12	0	6	0	9.9	6.21	843	1	1	1	889.731	2666.1711	3	2666.1667	0.0044	0	24.89	1.50E+02	R	DGVGMHGVAPDATVYEGNTNATDGFR	F	Oxidation (M)	0.00002000000000000000000000.0	Cmpd 380, AutoMSn(889.7310), 19.1 min	emPAI	0.03
20	gi|654095032	quinone oxidoreductase [Desulfuromonas sp. TF]	44	35439	3	0	1	0	2.4	5.47	306	1	1	1	437.7514	873.4883	2	873.4807	0.0075	0	41.5	5.9	R	TVVNLLES	-			Cmpd 259, AutoMSn(437.7514), 16.3 min
20	gi|654095032	quinone oxidoreductase [Desulfuromonas sp. TF]	44	35439	3	0	1	0	2.4	5.47	307	1	1	1	437.7522	873.4898	2	873.4807	0.009	0	42.2	5	R	TVVNLLES	-			Cmpd 256, AutoMSn(437.7522), 16.2 min
20	gi|654095032	quinone oxidoreductase [Desulfuromonas sp. TF]	44	35439	3	0	1	0	2.4	5.47	308	1	1	1	437.7554	873.4963	2	873.4807	0.0156	0	41.03	6.6	R	TVVNLLES	-			Cmpd 263, AutoMSn(437.7554), 16.4 min	emPAI	0.09
21	gi|229456890	TonB-linked outer membrane protein, SusC/RagA family [Bacteroides sp. 9_1_42FAA]	41	114916	3	0	1	0	0.7	5.69	329	1	1	1	454.748	907.4815	2	907.5127	-0.0312	1	35.49	18	K	TDYIRLK	N			Cmpd 369, AutoMSn(454.7480), 18.9 min
21	gi|229456890	TonB-linked outer membrane protein, SusC/RagA family [Bacteroides sp. 9_1_42FAA]	41	114916	3	0	1	0	0.7	5.69	330	1	1	1	454.7482	907.4818	2	907.5127	-0.0309	1	35.7	17	K	TDYIRLK	N			Cmpd 366, AutoMSn(454.7482), 18.8 min
21	gi|229456890	TonB-linked outer membrane protein, SusC/RagA family [Bacteroides sp. 9_1_42FAA]	41	114916	3	0	1	0	0.7	5.69	331	1	1	1	454.7491	907.4837	2	907.5127	-0.029	1	41.28	4.8	K	TDYIRLK	N			Cmpd 364, AutoMSn(454.7491), 18.7 min	emPAI	0.03
22	gi|381361115	hypothetical protein S23_47510 [Bradyrhizobium sp. S23321]	41	60732	3	0	1	0	1.3	6.58	329	1	0	1	454.748	907.4815	2	907.4763	0.0052	0	35.49	18	R	TDYILQR	V			Cmpd 369, AutoMSn(454.7480), 18.9 min
22	gi|381361115	hypothetical protein S23_47510 [Bradyrhizobium sp. S23321]	41	60732	3	0	1	0	1.3	6.58	330	1	0	1	454.7482	907.4818	2	907.4763	0.0055	0	35.7	17	R	TDYILQR	V			Cmpd 366, AutoMSn(454.7482), 18.8 min
22	gi|381361115	hypothetical protein S23_47510 [Bradyrhizobium sp. S23321]	41	60732	3	0	1	0	1.3	6.58	331	1	0	1	454.7491	907.4837	2	907.4763	0.0074	0	41.28	4.8	R	TDYILQR	V			Cmpd 364, AutoMSn(454.7491), 18.7 min	emPAI	0.05
23	gi|489967242	NAD-dependent DNA ligase LigA [Thermoanaerobacter ethanolicus]	41	75035	3	0	1	0	1.2	5.97	329	1	0	1	454.748	907.4815	2	907.5015	-0.02	0	35.49	18	K	TDYILVGK	D			Cmpd 369, AutoMSn(454.7480), 18.9 min
23	gi|489967242	NAD-dependent DNA ligase LigA [Thermoanaerobacter ethanolicus]	41	75035	3	0	1	0	1.2	5.97	330	1	0	1	454.7482	907.4818	2	907.5015	-0.0197	0	35.7	17	K	TDYILVGK	D			Cmpd 366, AutoMSn(454.7482), 18.8 min
23	gi|489967242	NAD-dependent DNA ligase LigA [Thermoanaerobacter ethanolicus]	41	75035	3	0	1	0	1.2	5.97	331	1	0	1	454.7491	907.4837	2	907.5015	-0.0178	0	41.28	4.8	K	TDYILVGK	D			Cmpd 364, AutoMSn(454.7491), 18.7 min	emPAI	0.04
24	gi|493565202	BRCA1 family protein with BRCT domain [Leptolyngbya sp. PCC 7375]	41	96328	3	0	1	0	0.9	4.83	329	1	0	1	454.748	907.4815	2	907.5015	-0.02	0	35.49	18	K	TDYIIVGK	N			Cmpd 369, AutoMSn(454.7480), 18.9 min
24	gi|493565202	BRCA1 family protein with BRCT domain [Leptolyngbya sp. PCC 7375]	41	96328	3	0	1	0	0.9	4.83	330	1	0	1	454.7482	907.4818	2	907.5015	-0.0197	0	35.7	17	K	TDYIIVGK	N			Cmpd 366, AutoMSn(454.7482), 18.8 min
24	gi|493565202	BRCA1 family protein with BRCT domain [Leptolyngbya sp. PCC 7375]	41	96328	3	0	1	0	0.9	4.83	331	1	0	1	454.7491	907.4837	2	907.5015	-0.0178	0	41.28	4.8	K	TDYIIVGK	N			Cmpd 364, AutoMSn(454.7491), 18.7 min	emPAI	0.03
25	gi|506288218	HemK family modification methylase [Pedobacter heparinus]	41	32096	3	0	1	0	2.4	4.89	329	1	0	1	454.748	907.4815	2	907.5127	-0.0312	1	35.49	18	R	TDYILRK	T			Cmpd 369, AutoMSn(454.7480), 18.9 min
25	gi|506288218	HemK family modification methylase [Pedobacter heparinus]	41	32096	3	0	1	0	2.4	4.89	330	1	0	1	454.7482	907.4818	2	907.5127	-0.0309	1	35.7	17	R	TDYILRK	T			Cmpd 366, AutoMSn(454.7482), 18.8 min
25	gi|506288218	HemK family modification methylase [Pedobacter heparinus]	41	32096	3	0	1	0	2.4	4.89	331	1	0	1	454.7491	907.4837	2	907.5127	-0.029	1	41.28	4.8	R	TDYILRK	T			Cmpd 364, AutoMSn(454.7491), 18.7 min	emPAI	0.1
26	gi|512486223	hypothetical protein [Paenisporosarcina sp. HGH0030]	41	129457	3	0	1	0	0.7	5.13	329	1	0	1	454.748	907.4815	2	907.5015	-0.02	0	35.49	18	K	TDYIAVVK	L			Cmpd 369, AutoMSn(454.7480), 18.9 min
26	gi|512486223	hypothetical protein [Paenisporosarcina sp. HGH0030]	41	129457	3	0	1	0	0.7	5.13	330	1	0	1	454.7482	907.4818	2	907.5015	-0.0197	0	35.7	17	K	TDYIAVVK	L			Cmpd 366, AutoMSn(454.7482), 18.8 min
26	gi|512486223	hypothetical protein [Paenisporosarcina sp. HGH0030]	41	129457	3	0	1	0	0.7	5.13	331	1	0	1	454.7491	907.4837	2	907.5015	-0.0178	0	41.28	4.8	K	TDYIAVVK	L			Cmpd 364, AutoMSn(454.7491), 18.7 min	emPAI	0.03
27	gi|518059550	hypothetical protein [Sedimentibacter sp. B4]	41	44306	3	0	1	0	1.8	5.76	329	1	0	1	454.748	907.4815	2	907.5127	-0.0312	1	35.49	18	M	TDYIIRK	F			Cmpd 369, AutoMSn(454.7480), 18.9 min
27	gi|518059550	hypothetical protein [Sedimentibacter sp. B4]	41	44306	3	0	1	0	1.8	5.76	330	1	0	1	454.7482	907.4818	2	907.5127	-0.0309	1	35.7	17	M	TDYIIRK	F			Cmpd 366, AutoMSn(454.7482), 18.8 min
27	gi|518059550	hypothetical protein [Sedimentibacter sp. B4]	41	44306	3	0	1	0	1.8	5.76	331	1	0	1	454.7491	907.4837	2	907.5127	-0.029	1	41.28	4.8	M	TDYIIRK	F			Cmpd 364, AutoMSn(454.7491), 18.7 min	emPAI	0.07
28	gi|518291446	MULTISPECIES: cytochrome C550 [Roseomonas]	41	32685	3	0	1	0	2.7	10.53	329	1	0	1	454.748	907.4815	2	907.4763	0.0052	0	35.49	18	R	TDYIAAVR	L			Cmpd 369, AutoMSn(454.7480), 18.9 min
28	gi|518291446	MULTISPECIES: cytochrome C550 [Roseomonas]	41	32685	3	0	1	0	2.7	10.53	330	1	0	1	454.7482	907.4818	2	907.4763	0.0055	0	35.7	17	R	TDYIAAVR	L			Cmpd 366, AutoMSn(454.7482), 18.8 min
28	gi|518291446	MULTISPECIES: cytochrome C550 [Roseomonas]	41	32685	3	0	1	0	2.7	10.53	331	1	0	1	454.7491	907.4837	2	907.4763	0.0074	0	41.28	4.8	R	TDYIAAVR	L			Cmpd 364, AutoMSn(454.7491), 18.7 min	emPAI	0.1
29	gi|565872949	TetR family transcriptional regulator [Williamsia sp. D3]	41	23864	3	0	1	0	3.3	5.87	329	1	0	1	454.748	907.4815	2	907.4763	0.0052	0	35.49	18	R	TDYIQLR	D			Cmpd 369, AutoMSn(454.7480), 18.9 min
29	gi|565872949	TetR family transcriptional regulator [Williamsia sp. D3]	41	23864	3	0	1	0	3.3	5.87	330	1	0	1	454.7482	907.4818	2	907.4763	0.0055	0	35.7	17	R	TDYIQLR	D			Cmpd 366, AutoMSn(454.7482), 18.8 min
29	gi|565872949	TetR family transcriptional regulator [Williamsia sp. D3]	41	23864	3	0	1	0	3.3	5.87	331	1	0	1	454.7491	907.4837	2	907.4763	0.0074	0	41.28	4.8	R	TDYIQLR	D			Cmpd 364, AutoMSn(454.7491), 18.7 min	emPAI	0.14
30	gi|738838832	hypothetical protein [Paenibacillus sp. FSL R7-277]	41	18627	3	0	1	0	4.9	9.48	329	1	0	1	454.748	907.4815	2	907.4763	0.0052	0	35.49	18	K	TDYIGALR	R			Cmpd 369, AutoMSn(454.7480), 18.9 min
30	gi|738838832	hypothetical protein [Paenibacillus sp. FSL R7-277]	41	18627	3	0	1	0	4.9	9.48	330	1	0	1	454.7482	907.4818	2	907.4763	0.0055	0	35.7	17	K	TDYIGALR	R			Cmpd 366, AutoMSn(454.7482), 18.8 min
30	gi|738838832	hypothetical protein [Paenibacillus sp. FSL R7-277]	41	18627	3	0	1	0	4.9	9.48	331	1	0	1	454.7491	907.4837	2	907.4763	0.0074	0	41.28	4.8	K	TDYIGALR	R			Cmpd 364, AutoMSn(454.7491), 18.7 min	emPAI	0.18
31	gi|697972349	DNA polymerase III subunit alpha [Cellulomonas carbonis T26]	40	122653	1	0	1	0	1	5.99	450	1	1	1	563.2763	1124.5381	2	1124.5938	-0.0557	0	39.57	6.1	R	SIAEAHLATGR	K			Cmpd 161, AutoMSn(563.2763), 14.1 min	emPAI	0.03
32	gi|739612495	phosphotyrosine protein phosphatase [Sphingobium herbicidovorans]	40	16832	1	0	1	0	7.2	5.5	450	1	0	1	563.2763	1124.5381	2	1124.5826	-0.0444	0	39.57	6.1	R	AEAEHAGLSIK	V			Cmpd 161, AutoMSn(563.2763), 14.1 min	emPAI	0.2
33	gi|491822674	FAD-binding oxidoreductase [Pseudomonas avellanae]	39	41131	3	0	1	0	5.2	6.15	776	3	0	1	744.736	2231.1861	3	2231.2321	-0.046	1	24.97	1.40E+02	R	QAVAALCQVVRQQGLLLEHR	E			Cmpd 462, AutoMSn(744.7360), 21.0 min
33	gi|491822674	FAD-binding oxidoreductase [Pseudomonas avellanae]	39	41131	3	0	1	0	5.2	6.15	777	2	0	1	744.7368	2231.1884	3	2231.2321	-0.0436	1	25.62	1.20E+02	R	QAVAALCQVVRQQGLLLEHR	E			Cmpd 459, AutoMSn(744.7367), 20.9 min
33	gi|491822674	FAD-binding oxidoreductase [Pseudomonas avellanae]	39	41131	3	0	1	0	5.2	6.15	778	1	0	1	744.7371	2231.1894	3	2231.2321	-0.0427	1	39.36	5.1	R	QAVAALCQVVRQQGLLLEHR	E			Cmpd 458, AutoMSn(744.7371), 20.9 min	emPAI	0.08
34	gi|737974488	peptidase S1 [Burkholderia glathei]	39	59842	5	0	2	0	7.6	5.23	769	1	0	1	732.0508	2193.1305	3	2193.1079	0.0225	1	36.76	9	R	QAGNPVGALPTAAADAWYHRK	L			Cmpd 396, AutoMSn(732.0508), 19.5 min
34	gi|737974488	peptidase S1 [Burkholderia glathei]	39	59842	5	0	2	0	7.6	5.23	771	1	0	1	732.0519	2193.134	3	2193.1079	0.0261	1	36.55	9.4	R	QAGNPVGALPTAAADAWYHRK	L			Cmpd 394, AutoMSn(732.0519), 19.4 min
34	gi|737974488	peptidase S1 [Burkholderia glathei]	39	59842	5	0	2	0	7.6	5.23	805	1	0	0	786.7427	2357.2063	3	2357.1863	0.02	0	58.74	0.055	R	LHEDGVDLNGITLQSSILDYR	Q			Cmpd 605, AutoMSn(786.7427), 24.2 min
34	gi|737974488	peptidase S1 [Burkholderia glathei]	39	59842	5	0	2	0	7.6	5.23	806	1	0	0	786.7432	2357.2078	3	2357.1863	0.0215	0	55.75	0.11	R	LHEDGVDLNGITLQSSILDYR	Q			Cmpd 608, AutoMSn(786.7432), 24.3 min
34	gi|737974488	peptidase S1 [Burkholderia glathei]	39	59842	5	0	2	0	7.6	5.23	807	1	0	0	786.7449	2357.2129	3	2357.1863	0.0266	0	52.53	0.23	R	LHEDGVDLNGITLQSSILDYR	Q			Cmpd 611, AutoMSn(786.7449), 24.3 min	emPAI	0.05
35	gi|518076544	hypothetical protein [Candidatus Alistipes marseilloanorexicus]	39	21347	1	0	1	0	6.5	9.24	450	3	0	1	563.2763	1124.5381	2	1124.5462	-0.0081	0	38.8	7.3	K	ISAEAHPVGSSA	-			Cmpd 161, AutoMSn(563.2763), 14.1 min	emPAI	0.16
