# Supplementary material for: Altered proteome of a Burkholderia pseudomallei mutant defective in short-chain dehydrogenase affects cell adhesion, biofilm formation and heat stress tolerance
Source: PeerJ. 2020 Mar 19;8:e8659. doi: 10.7717/peerj.8659 (PMC7085900; doi:10.7717/peerj.8659)
Supplement: Supplemental Information 2 [file peerj-08-8659-s002.csv]

Header	--------------------------------------------------------
Search title	Submitted from Bp 2Jan2018 bac by Mascot Daemon on SERVER-BIOINFO
Timestamp	2018-01-05T06:08:12Z
User
Email
Report URI	http://localhost/mascot/cgi/master_results.pl?file=../data/20180105/F006293.dat
Peak list data path	C:\Users\onrapak.r\Desktop\mgf\Bp_2Jan2018\K9_89_GA7_01_11491.mgf
Peak list format	Mascot generic
Search type	MIS
Mascot version	2.3.02
Database	NCBInr
Fasta file	NCBInr_2015_03_01.fasta
Total sequences	61390244
Total residues	21889222377
Sequences after taxonomy filter	41003219
Number of queries	749
Variable modifications	--------------------------------------------------------
Identifier	Name	Delta	Neutral loss(es)
1	Carbamidomethyl (C)	57.021464
2	Oxidation (M)	15.994915	0	63.998285
Search Parameters	--------------------------------------------------------
Taxonomy filter	. . Bacteria (Eubacteria)
Enzyme	Trypsin
Maximum Missed Cleavages	1
Fixed modifications
Variable modifications	Carbamidomethyl (C),Oxidation (M)
Peptide Mass Tolerance	0.8
Peptide Mass Tolerance Units	Da
Fragment Mass Tolerance	0.8
Fragment Mass Tolerance Units	Da
Mass values	Monoisotopic
Instrument type	ESI-QUAD-TOF
Format parameters	--------------------------------------------------------
Significance threshold	0.05
Max. number of hits	0
Use MudPIT protein scoring	1
Ions score cut-off	0
Include same-set proteins
Include sub-set proteins	0
Include unassigned	0
Require bold red	0
Use homology threshold	0
Group protein families	0
Protein hits	--------------------------------------------------------
prot_hit_num	prot_acc	prot_desc	prot_score	prot_mass	prot_matches	prot_matches_sig	prot_sequences	prot_sequences_sig	prot_cover	prot_pi	pep_query	pep_rank	pep_isbold	pep_isunique	pep_exp_mz	pep_exp_mr	pep_exp_z	pep_calc_mr	pep_delta	pep_miss	pep_score	pep_expect	pep_res_before	pep_seq	pep_res_after	pep_var_mod	pep_var_mod_pos	pep_scan_title
1	gi|490657098	ABC transporter [Burkholderia pseudomallei]	337	36306	40	10	15	5	48.8	9.4	111	1	1	0	514.7793	1027.5439	2	1027.541	0.0029	0	40.27	31	K	NIPVTSQNR	I			Cmpd 92, AutoMSn(514.7792), 13.0 min
1	gi|490657098	ABC transporter [Burkholderia pseudomallei]	337	36306	40	10	15	5	48.8	9.4	445	5	1	0	564.3019	1126.5893	2	1126.5811	0.0082	0	17.53	1.00E+03	K	WFENPIPPK	G			Cmpd 394, AutoMSn(564.3019), 19.9 min
1	gi|490657098	ABC transporter [Burkholderia pseudomallei]	337	36306	40	10	15	5	48.8	9.4	457	7	1	0	389.5852	1165.7337	3	1165.7183	0.0155	1	24.73	2.10E+02	K	KLNLPNLQVK	N			Cmpd 317, AutoMSn(389.5852), 18.1 min
1	gi|490657098	ABC transporter [Burkholderia pseudomallei]	337	36306	40	10	15	5	48.8	9.4	474	1	1	1	607.837	1213.6594	2	1213.6554	0.004	0	55.59	0.17	K	VVDDAIVQVEK	S			Cmpd 304, AutoMSn(607.8370), 17.8 min
1	gi|490657098	ABC transporter [Burkholderia pseudomallei]	337	36306	40	10	15	5	48.8	9.4	475	1	1	1	607.8382	1213.6618	2	1213.6554	0.0063	0	57.61	0.11	K	VVDDAIVQVEK	S			Cmpd 301, AutoMSn(607.8382), 17.8 min
1	gi|490657098	ABC transporter [Burkholderia pseudomallei]	337	36306	40	10	15	5	48.8	9.4	476	1	1	1	607.8384	1213.6623	2	1213.6554	0.0068	0	69.83	0.0065	K	VVDDAIVQVEK	S			Cmpd 307, AutoMSn(607.8384), 17.9 min
1	gi|490657098	ABC transporter [Burkholderia pseudomallei]	337	36306	40	10	15	5	48.8	9.4	478	1	1	0	611.8215	1221.6285	2	1221.6201	0.0084	0	57.91	0.094	K	TVVTTAGTTSER	L			Cmpd 87, AutoMSn(611.8215), 12.9 min
1	gi|490657098	ABC transporter [Burkholderia pseudomallei]	337	36306	40	10	15	5	48.8	9.4	479	1	1	0	611.8229	1221.6312	2	1221.6201	0.0111	0	55.53	0.16	K	TVVTTAGTTSER	L			Cmpd 90, AutoMSn(611.8229), 13.0 min
1	gi|490657098	ABC transporter [Burkholderia pseudomallei]	337	36306	40	10	15	5	48.8	9.4	480	1	1	0	611.8235	1221.6325	2	1221.6201	0.0124	0	61.7	0.039	K	TVVTTAGTTSER	L			Cmpd 84, AutoMSn(611.8235), 12.8 min
1	gi|490657098	ABC transporter [Burkholderia pseudomallei]	337	36306	40	10	15	5	48.8	9.4	485	1	1	0	617.3118	1232.609	2	1232.6037	0.0053	1	42.36	3.7	K	LYANPNDKALD	-			Cmpd 223, AutoMSn(617.3118), 16.0 min
1	gi|490657098	ABC transporter [Burkholderia pseudomallei]	337	36306	40	10	15	5	48.8	9.4	487	1	1	0	617.3129	1232.6113	2	1232.6037	0.0076	1	44.79	2.1	K	LYANPNDKALD	-			Cmpd 220, AutoMSn(617.3129), 16.0 min
1	gi|490657098	ABC transporter [Burkholderia pseudomallei]	337	36306	40	10	15	5	48.8	9.4	511	1	1	0	640.377	1278.7395	2	1278.7408	-0.0013	1	38.02	9.2	K	IKDTGVIALGHR	E			Cmpd 165, AutoMSn(640.3770), 14.7 min
1	gi|490657098	ABC transporter [Burkholderia pseudomallei]	337	36306	40	10	15	5	48.8	9.4	513	2	1	0	640.3818	1278.749	2	1278.7408	0.0082	1	23.73	2.50E+02	K	IKDTGVIALGHR	E			Cmpd 162, AutoMSn(640.3818), 14.6 min
1	gi|490657098	ABC transporter [Burkholderia pseudomallei]	337	36306	40	10	15	5	48.8	9.4	514	1	1	0	427.2579	1278.7519	3	1278.7408	0.0111	1	40.59	5.2	K	IKDTGVIALGHR	E			Cmpd 158, AutoMSn(427.2579), 14.5 min
1	gi|490657098	ABC transporter [Burkholderia pseudomallei]	337	36306	40	10	15	5	48.8	9.4	515	1	1	0	427.2581	1278.7524	3	1278.7408	0.0116	1	37.69	10	K	IKDTGVIALGHR	E			Cmpd 161, AutoMSn(427.2581), 14.6 min
1	gi|490657098	ABC transporter [Burkholderia pseudomallei]	337	36306	40	10	15	5	48.8	9.4	516	5	1	0	427.2597	1278.7573	3	1278.7408	0.0165	1	22.29	3.50E+02	K	IKDTGVIALGHR	E			Cmpd 156, AutoMSn(427.2597), 14.5 min
1	gi|490657098	ABC transporter [Burkholderia pseudomallei]	337	36306	40	10	15	5	48.8	9.4	584	2	1	0	492.8985	1475.6737	3	1475.6641	0.0096	0	31.39	41	K	DHGESFQTLETGR	A			Cmpd 230, AutoMSn(492.8985), 16.2 min
1	gi|490657098	ABC transporter [Burkholderia pseudomallei]	337	36306	40	10	15	5	48.8	9.4	585	1	1	0	492.8999	1475.6779	3	1475.6641	0.0138	0	34.28	21	K	DHGESFQTLETGR	A			Cmpd 227, AutoMSn(492.8999), 16.1 min
1	gi|490657098	ABC transporter [Burkholderia pseudomallei]	337	36306	40	10	15	5	48.8	9.4	586	1	1	0	492.9035	1475.6888	3	1475.6641	0.0247	0	34.53	20	K	DHGESFQTLETGR	A			Cmpd 225, AutoMSn(492.9035), 16.0 min
1	gi|490657098	ABC transporter [Burkholderia pseudomallei]	337	36306	40	10	15	5	48.8	9.4	605	1	1	0	763.4077	1524.8009	2	1524.7937	0.0072	0	98.31	7.80E-06	K	QAAFSDTIFVIGTR	L			Cmpd 576, AutoMSn(763.4077), 24.1 min
1	gi|490657098	ABC transporter [Burkholderia pseudomallei]	337	36306	40	10	15	5	48.8	9.4	606	1	1	0	763.4079	1524.8012	2	1524.7937	0.0075	0	73.36	0.0025	K	QAAFSDTIFVIGTR	L			Cmpd 584, AutoMSn(763.4079), 24.3 min
1	gi|490657098	ABC transporter [Burkholderia pseudomallei]	337	36306	40	10	15	5	48.8	9.4	282	1	1	0	763.4085	1524.8024	2	1524.7937	0.0087	0	54.43	0.66	K	QAAFSDTIFVIGTR	L			Cmpd 570, AutoMSn(763.4085), 24.0 min
1	gi|490657098	ABC transporter [Burkholderia pseudomallei]	337	36306	40	10	15	5	48.8	9.4	607	1	1	0	763.4089	1524.8031	2	1524.7937	0.0095	0	102.22	3.20E-06	K	QAAFSDTIFVIGTR	L			Cmpd 573, AutoMSn(763.4089), 24.1 min
1	gi|490657098	ABC transporter [Burkholderia pseudomallei]	337	36306	40	10	15	5	48.8	9.4	608	1	1	0	509.275	1524.8032	3	1524.7937	0.0095	0	37.8	8.8	K	QAAFSDTIFVIGTR	L			Cmpd 583, AutoMSn(509.2750), 24.3 min
1	gi|490657098	ABC transporter [Burkholderia pseudomallei]	337	36306	40	10	15	5	48.8	9.4	620	1	1	1	541.2854	1620.8345	3	1620.8181	0.0164	1	37.57	9	K	GLNLNFPLSDEMKK	L	Oxidation (M)	0.00000000000200.0	Cmpd 407, AutoMSn(541.2854), 20.3 min
1	gi|490657098	ABC transporter [Burkholderia pseudomallei]	337	36306	40	10	15	5	48.8	9.4	621	2	1	1	541.2865	1620.8376	3	1620.8181	0.0195	1	31.42	37	K	GLNLNFPLSDEMKK	L	Oxidation (M)	0.00000000000200.0	Cmpd 404, AutoMSn(541.2865), 20.2 min
1	gi|490657098	ABC transporter [Burkholderia pseudomallei]	337	36306	40	10	15	5	48.8	9.4	630	3	1	0	821.3881	1640.7617	2	1640.7538	0.0079	0	16.62	1.20E+03	R	AVAFMMDDALLAGER	A	2 Oxidation (M)	0.000022000000000.0	Cmpd 426, AutoMSn(821.3881), 20.7 min
1	gi|490657098	ABC transporter [Burkholderia pseudomallei]	337	36306	40	10	15	5	48.8	9.4	631	2	1	0	821.3897	1640.7648	2	1640.7538	0.011	0	97.17	1.00E-05	R	AVAFMMDDALLAGER	A	2 Oxidation (M)	0.000022000000000.0	Cmpd 429, AutoMSn(821.3897), 20.8 min
1	gi|490657098	ABC transporter [Burkholderia pseudomallei]	337	36306	40	10	15	5	48.8	9.4	632	7	1	0	547.9292	1640.7659	3	1640.7538	0.0121	0	41.16	4	R	AVAFMMDDALLAGER	A	2 Oxidation (M)	0.000022000000000.0	Cmpd 433, AutoMSn(547.9292), 20.9 min
1	gi|490657098	ABC transporter [Burkholderia pseudomallei]	337	36306	40	10	15	5	48.8	9.4	633	2	1	0	821.3903	1640.766	2	1640.7538	0.0122	0	98.4	7.60E-06	R	AVAFMMDDALLAGER	A	2 Oxidation (M)	0.000022000000000.0	Cmpd 432, AutoMSn(821.3903), 20.9 min
1	gi|490657098	ABC transporter [Burkholderia pseudomallei]	337	36306	40	10	15	5	48.8	9.4	649	1	1	1	586.651	1756.9312	3	1756.9207	0.0105	1	36.67	11	K	VVDDAIVQVEKSGEAAK	I			Cmpd 289, AutoMSn(586.6510), 17.5 min
1	gi|490657098	ABC transporter [Burkholderia pseudomallei]	337	36306	40	10	15	5	48.8	9.4	650	2	1	1	586.6511	1756.9315	3	1756.9207	0.0108	1	28.85	66	K	VVDDAIVQVEKSGEAAK	I			Cmpd 292, AutoMSn(586.6511), 17.6 min
1	gi|490657098	ABC transporter [Burkholderia pseudomallei]	337	36306	40	10	15	5	48.8	9.4	651	3	1	1	586.6517	1756.9332	3	1756.9207	0.0126	1	22.95	2.60E+02	K	VVDDAIVQVEKSGEAAK	I			Cmpd 287, AutoMSn(586.6517), 17.4 min
1	gi|490657098	ABC transporter [Burkholderia pseudomallei]	337	36306	40	10	15	5	48.8	9.4	661	1	1	0	594.661	1780.9612	3	1780.9472	0.014	1	48.87	0.65	R	QKQAAFSDTIFVIGTR	L			Cmpd 447, AutoMSn(594.6610), 21.2 min
1	gi|490657098	ABC transporter [Burkholderia pseudomallei]	337	36306	40	10	15	5	48.8	9.4	662	1	1	0	594.6624	1780.9655	3	1780.9472	0.0183	1	40.94	4	R	QKQAAFSDTIFVIGTR	L			Cmpd 444, AutoMSn(594.6624), 21.1 min
1	gi|490657098	ABC transporter [Burkholderia pseudomallei]	337	36306	40	10	15	5	48.8	9.4	667	4	1	0	614.3086	1839.9039	3	1839.8859	0.018	1	27.67	81	R	AVAFMMDDALLAGERAK	A	2 Oxidation (M)	0.00002200000000000.0	Cmpd 340, AutoMSn(614.3086), 18.7 min
1	gi|490657098	ABC transporter [Burkholderia pseudomallei]	337	36306	40	10	15	5	48.8	9.4	711	1	1	0	789.7071	2366.0995	3	2366.0815	0.018	0	37.01	8.6	R	ESSIPFSYYDQNQQVVGYSR	D			Cmpd 488, AutoMSn(789.7071), 22.1 min
1	gi|490657098	ABC transporter [Burkholderia pseudomallei]	337	36306	40	10	15	5	48.8	9.4	712	1	1	0	789.7083	2366.1031	3	2366.0815	0.0216	0	59.36	0.05	R	ESSIPFSYYDQNQQVVGYSR	D			Cmpd 503, AutoMSn(789.7083), 22.5 min
1	gi|490657098	ABC transporter [Burkholderia pseudomallei]	337	36306	40	10	15	5	48.8	9.4	713	1	1	0	789.7084	2366.1033	3	2366.0815	0.0218	0	86.99	8.50E-05	R	ESSIPFSYYDQNQQVVGYSR	D			Cmpd 491, AutoMSn(789.7084), 22.2 min
1	gi|490657098	ABC transporter [Burkholderia pseudomallei]	337	36306	40	10	15	5	48.8	9.4	714	1	1	0	789.7085	2366.1038	3	2366.0815	0.0223	0	60.13	0.041	R	ESSIPFSYYDQNQQVVGYSR	D			Cmpd 494, AutoMSn(789.7085), 22.3 min	emPAI	0.69
2	gi|740969768	ABC transporter [Burkholderia pseudomallei]	326	32630	34	9	13	4	48.1	9.17	111	1	0	0	514.7793	1027.5439	2	1027.541	0.0029	0	40.27	31	K	NIPVTSQNR	I			Cmpd 92, AutoMSn(514.7792), 13.0 min
2	gi|740969768	ABC transporter [Burkholderia pseudomallei]	326	32630	34	9	13	4	48.1	9.17	445	5	0	0	564.3019	1126.5893	2	1126.5811	0.0082	0	17.53	1.00E+03	K	WFENPIPPK	G			Cmpd 394, AutoMSn(564.3019), 19.9 min
2	gi|740969768	ABC transporter [Burkholderia pseudomallei]	326	32630	34	9	13	4	48.1	9.17	457	7	0	0	389.5852	1165.7337	3	1165.7183	0.0155	1	24.73	2.10E+02	K	KLNLPNLQVK	N			Cmpd 317, AutoMSn(389.5852), 18.1 min
2	gi|740969768	ABC transporter [Burkholderia pseudomallei]	326	32630	34	9	13	4	48.1	9.17	478	1	0	0	611.8215	1221.6285	2	1221.6201	0.0084	0	57.91	0.094	K	TVVTTAGTTSER	L			Cmpd 87, AutoMSn(611.8215), 12.9 min
2	gi|740969768	ABC transporter [Burkholderia pseudomallei]	326	32630	34	9	13	4	48.1	9.17	479	1	0	0	611.8229	1221.6312	2	1221.6201	0.0111	0	55.53	0.16	K	TVVTTAGTTSER	L			Cmpd 90, AutoMSn(611.8229), 13.0 min
2	gi|740969768	ABC transporter [Burkholderia pseudomallei]	326	32630	34	9	13	4	48.1	9.17	480	1	0	0	611.8235	1221.6325	2	1221.6201	0.0124	0	61.7	0.039	K	TVVTTAGTTSER	L			Cmpd 84, AutoMSn(611.8235), 12.8 min
2	gi|740969768	ABC transporter [Burkholderia pseudomallei]	326	32630	34	9	13	4	48.1	9.17	485	1	0	0	617.3118	1232.609	2	1232.6037	0.0053	1	42.36	3.7	K	LYANPNDKALD	-			Cmpd 223, AutoMSn(617.3118), 16.0 min
2	gi|740969768	ABC transporter [Burkholderia pseudomallei]	326	32630	34	9	13	4	48.1	9.17	487	1	0	0	617.3129	1232.6113	2	1232.6037	0.0076	1	44.79	2.1	K	LYANPNDKALD	-			Cmpd 220, AutoMSn(617.3129), 16.0 min
2	gi|740969768	ABC transporter [Burkholderia pseudomallei]	326	32630	34	9	13	4	48.1	9.17	511	1	0	0	640.377	1278.7395	2	1278.7408	-0.0013	1	38.02	9.2	K	IKDTGVIALGHR	E			Cmpd 165, AutoMSn(640.3770), 14.7 min
2	gi|740969768	ABC transporter [Burkholderia pseudomallei]	326	32630	34	9	13	4	48.1	9.17	513	2	0	0	640.3818	1278.749	2	1278.7408	0.0082	1	23.73	2.50E+02	K	IKDTGVIALGHR	E			Cmpd 162, AutoMSn(640.3818), 14.6 min
2	gi|740969768	ABC transporter [Burkholderia pseudomallei]	326	32630	34	9	13	4	48.1	9.17	514	1	0	0	427.2579	1278.7519	3	1278.7408	0.0111	1	40.59	5.2	K	IKDTGVIALGHR	E			Cmpd 158, AutoMSn(427.2579), 14.5 min
2	gi|740969768	ABC transporter [Burkholderia pseudomallei]	326	32630	34	9	13	4	48.1	9.17	515	1	0	0	427.2581	1278.7524	3	1278.7408	0.0116	1	37.69	10	K	IKDTGVIALGHR	E			Cmpd 161, AutoMSn(427.2581), 14.6 min
2	gi|740969768	ABC transporter [Burkholderia pseudomallei]	326	32630	34	9	13	4	48.1	9.17	516	5	0	0	427.2597	1278.7573	3	1278.7408	0.0165	1	22.29	3.50E+02	K	IKDTGVIALGHR	E			Cmpd 156, AutoMSn(427.2597), 14.5 min
2	gi|740969768	ABC transporter [Burkholderia pseudomallei]	326	32630	34	9	13	4	48.1	9.17	584	2	0	0	492.8985	1475.6737	3	1475.6641	0.0096	0	31.39	41	K	DHGESFQTLETGR	A			Cmpd 230, AutoMSn(492.8985), 16.2 min
2	gi|740969768	ABC transporter [Burkholderia pseudomallei]	326	32630	34	9	13	4	48.1	9.17	585	1	0	0	492.8999	1475.6779	3	1475.6641	0.0138	0	34.28	21	K	DHGESFQTLETGR	A			Cmpd 227, AutoMSn(492.8999), 16.1 min
2	gi|740969768	ABC transporter [Burkholderia pseudomallei]	326	32630	34	9	13	4	48.1	9.17	586	1	0	0	492.9035	1475.6888	3	1475.6641	0.0247	0	34.53	20	K	DHGESFQTLETGR	A			Cmpd 225, AutoMSn(492.9035), 16.0 min
2	gi|740969768	ABC transporter [Burkholderia pseudomallei]	326	32630	34	9	13	4	48.1	9.17	605	1	0	0	763.4077	1524.8009	2	1524.7937	0.0072	0	98.31	7.80E-06	K	QAAFSDTIFVIGTR	L			Cmpd 576, AutoMSn(763.4077), 24.1 min
2	gi|740969768	ABC transporter [Burkholderia pseudomallei]	326	32630	34	9	13	4	48.1	9.17	606	1	0	0	763.4079	1524.8012	2	1524.7937	0.0075	0	73.36	0.0025	K	QAAFSDTIFVIGTR	L			Cmpd 584, AutoMSn(763.4079), 24.3 min
2	gi|740969768	ABC transporter [Burkholderia pseudomallei]	326	32630	34	9	13	4	48.1	9.17	282	1	0	0	763.4085	1524.8024	2	1524.7937	0.0087	0	54.43	0.66	K	QAAFSDTIFVIGTR	L			Cmpd 570, AutoMSn(763.4085), 24.0 min
2	gi|740969768	ABC transporter [Burkholderia pseudomallei]	326	32630	34	9	13	4	48.1	9.17	607	1	0	0	763.4089	1524.8031	2	1524.7937	0.0095	0	102.22	3.20E-06	K	QAAFSDTIFVIGTR	L			Cmpd 573, AutoMSn(763.4089), 24.1 min
2	gi|740969768	ABC transporter [Burkholderia pseudomallei]	326	32630	34	9	13	4	48.1	9.17	608	1	0	0	509.275	1524.8032	3	1524.7937	0.0095	0	37.8	8.8	K	QAAFSDTIFVIGTR	L			Cmpd 583, AutoMSn(509.2750), 24.3 min
2	gi|740969768	ABC transporter [Burkholderia pseudomallei]	326	32630	34	9	13	4	48.1	9.17	620	1	0	1	541.2854	1620.8345	3	1620.8181	0.0164	1	37.57	9	K	GLNLNFPISDEMKK	L	Oxidation (M)	0.00000000000200.0	Cmpd 407, AutoMSn(541.2854), 20.3 min
2	gi|740969768	ABC transporter [Burkholderia pseudomallei]	326	32630	34	9	13	4	48.1	9.17	621	2	0	1	541.2865	1620.8376	3	1620.8181	0.0195	1	31.42	37	K	GLNLNFPISDEMKK	L	Oxidation (M)	0.00000000000200.0	Cmpd 404, AutoMSn(541.2865), 20.2 min
2	gi|740969768	ABC transporter [Burkholderia pseudomallei]	326	32630	34	9	13	4	48.1	9.17	630	3	0	0	821.3881	1640.7617	2	1640.7538	0.0079	0	16.62	1.20E+03	R	AVAFMMDDALLAGER	A	2 Oxidation (M)	0.000022000000000.0	Cmpd 426, AutoMSn(821.3881), 20.7 min
2	gi|740969768	ABC transporter [Burkholderia pseudomallei]	326	32630	34	9	13	4	48.1	9.17	631	2	0	0	821.3897	1640.7648	2	1640.7538	0.011	0	97.17	1.00E-05	R	AVAFMMDDALLAGER	A	2 Oxidation (M)	0.000022000000000.0	Cmpd 429, AutoMSn(821.3897), 20.8 min
2	gi|740969768	ABC transporter [Burkholderia pseudomallei]	326	32630	34	9	13	4	48.1	9.17	632	7	0	0	547.9292	1640.7659	3	1640.7538	0.0121	0	41.16	4	R	AVAFMMDDALLAGER	A	2 Oxidation (M)	0.000022000000000.0	Cmpd 433, AutoMSn(547.9292), 20.9 min
2	gi|740969768	ABC transporter [Burkholderia pseudomallei]	326	32630	34	9	13	4	48.1	9.17	633	2	0	0	821.3903	1640.766	2	1640.7538	0.0122	0	98.4	7.60E-06	R	AVAFMMDDALLAGER	A	2 Oxidation (M)	0.000022000000000.0	Cmpd 432, AutoMSn(821.3903), 20.9 min
2	gi|740969768	ABC transporter [Burkholderia pseudomallei]	326	32630	34	9	13	4	48.1	9.17	661	1	0	0	594.661	1780.9612	3	1780.9472	0.014	1	48.87	0.65	R	QKQAAFSDTIFVIGTR	L			Cmpd 447, AutoMSn(594.6610), 21.2 min
2	gi|740969768	ABC transporter [Burkholderia pseudomallei]	326	32630	34	9	13	4	48.1	9.17	662	1	0	0	594.6624	1780.9655	3	1780.9472	0.0183	1	40.94	4	R	QKQAAFSDTIFVIGTR	L			Cmpd 444, AutoMSn(594.6624), 21.1 min
2	gi|740969768	ABC transporter [Burkholderia pseudomallei]	326	32630	34	9	13	4	48.1	9.17	667	4	0	0	614.3086	1839.9039	3	1839.8859	0.018	1	27.67	81	R	AVAFMMDDALLAGERAK	A	2 Oxidation (M)	0.00002200000000000.0	Cmpd 340, AutoMSn(614.3086), 18.7 min
2	gi|740969768	ABC transporter [Burkholderia pseudomallei]	326	32630	34	9	13	4	48.1	9.17	711	1	0	0	789.7071	2366.0995	3	2366.0815	0.018	0	37.01	8.6	R	ESSIPFSYYDQNQQVVGYSR	D			Cmpd 488, AutoMSn(789.7071), 22.1 min
2	gi|740969768	ABC transporter [Burkholderia pseudomallei]	326	32630	34	9	13	4	48.1	9.17	712	1	0	0	789.7083	2366.1031	3	2366.0815	0.0216	0	59.36	0.05	R	ESSIPFSYYDQNQQVVGYSR	D			Cmpd 503, AutoMSn(789.7083), 22.5 min
2	gi|740969768	ABC transporter [Burkholderia pseudomallei]	326	32630	34	9	13	4	48.1	9.17	713	1	0	0	789.7084	2366.1033	3	2366.0815	0.0218	0	86.99	8.50E-05	R	ESSIPFSYYDQNQQVVGYSR	D			Cmpd 491, AutoMSn(789.7084), 22.2 min
2	gi|740969768	ABC transporter [Burkholderia pseudomallei]	326	32630	34	9	13	4	48.1	9.17	714	1	0	0	789.7085	2366.1038	3	2366.0815	0.0223	0	60.13	0.041	R	ESSIPFSYYDQNQQVVGYSR	D			Cmpd 494, AutoMSn(789.7085), 22.3 min	emPAI	0.62
3	gi|124871098	Extracellular solute-binding protein, family 12 [Burkholderia cenocepacia PC184]	223	32936	24	6	10	3	38.7	9.11	111	1	0	0	514.7793	1027.5439	2	1027.541	0.0029	0	40.27	31	K	NIPVTSQNR	I			Cmpd 92, AutoMSn(514.7792), 13.0 min
3	gi|124871098	Extracellular solute-binding protein, family 12 [Burkholderia cenocepacia PC184]	223	32936	24	6	10	3	38.7	9.11	445	5	0	0	564.3019	1126.5893	2	1126.5811	0.0082	0	17.53	1.00E+03	K	WFENPIPPK	G			Cmpd 394, AutoMSn(564.3019), 19.9 min
3	gi|124871098	Extracellular solute-binding protein, family 12 [Burkholderia cenocepacia PC184]	223	32936	24	6	10	3	38.7	9.11	457	7	0	0	389.5852	1165.7337	3	1165.7183	0.0155	1	24.73	2.10E+02	K	KLNLPNLQVK	N			Cmpd 317, AutoMSn(389.5852), 18.1 min
3	gi|124871098	Extracellular solute-binding protein, family 12 [Burkholderia cenocepacia PC184]	223	32936	24	6	10	3	38.7	9.11	478	1	0	0	611.8215	1221.6285	2	1221.6201	0.0084	0	57.91	0.094	K	TVVTTAGTTSER	L			Cmpd 87, AutoMSn(611.8215), 12.9 min
3	gi|124871098	Extracellular solute-binding protein, family 12 [Burkholderia cenocepacia PC184]	223	32936	24	6	10	3	38.7	9.11	479	1	0	0	611.8229	1221.6312	2	1221.6201	0.0111	0	55.53	0.16	K	TVVTTAGTTSER	L			Cmpd 90, AutoMSn(611.8229), 13.0 min
3	gi|124871098	Extracellular solute-binding protein, family 12 [Burkholderia cenocepacia PC184]	223	32936	24	6	10	3	38.7	9.11	480	1	0	0	611.8235	1221.6325	2	1221.6201	0.0124	0	61.7	0.039	K	TVVTTAGTTSER	L			Cmpd 84, AutoMSn(611.8235), 12.8 min
3	gi|124871098	Extracellular solute-binding protein, family 12 [Burkholderia cenocepacia PC184]	223	32936	24	6	10	3	38.7	9.11	485	1	0	0	617.3118	1232.609	2	1232.6037	0.0053	1	42.36	3.7	K	LYANPNDKALD	-			Cmpd 223, AutoMSn(617.3118), 16.0 min
3	gi|124871098	Extracellular solute-binding protein, family 12 [Burkholderia cenocepacia PC184]	223	32936	24	6	10	3	38.7	9.11	487	1	0	0	617.3129	1232.6113	2	1232.6037	0.0076	1	44.79	2.1	K	LYANPNDKALD	-			Cmpd 220, AutoMSn(617.3129), 16.0 min
3	gi|124871098	Extracellular solute-binding protein, family 12 [Burkholderia cenocepacia PC184]	223	32936	24	6	10	3	38.7	9.11	511	1	0	0	640.377	1278.7395	2	1278.7408	-0.0013	1	38.02	9.2	K	IKDTGVIALGHR	E			Cmpd 165, AutoMSn(640.3770), 14.7 min
3	gi|124871098	Extracellular solute-binding protein, family 12 [Burkholderia cenocepacia PC184]	223	32936	24	6	10	3	38.7	9.11	513	2	0	0	640.3818	1278.749	2	1278.7408	0.0082	1	23.73	2.50E+02	K	IKDTGVIALGHR	E			Cmpd 162, AutoMSn(640.3818), 14.6 min
3	gi|124871098	Extracellular solute-binding protein, family 12 [Burkholderia cenocepacia PC184]	223	32936	24	6	10	3	38.7	9.11	514	1	0	0	427.2579	1278.7519	3	1278.7408	0.0111	1	40.59	5.2	K	IKDTGVIALGHR	E			Cmpd 158, AutoMSn(427.2579), 14.5 min
3	gi|124871098	Extracellular solute-binding protein, family 12 [Burkholderia cenocepacia PC184]	223	32936	24	6	10	3	38.7	9.11	515	1	0	0	427.2581	1278.7524	3	1278.7408	0.0116	1	37.69	10	K	IKDTGVIALGHR	E			Cmpd 161, AutoMSn(427.2581), 14.6 min
3	gi|124871098	Extracellular solute-binding protein, family 12 [Burkholderia cenocepacia PC184]	223	32936	24	6	10	3	38.7	9.11	516	5	0	0	427.2597	1278.7573	3	1278.7408	0.0165	1	22.29	3.50E+02	K	IKDTGVIALGHR	E			Cmpd 156, AutoMSn(427.2597), 14.5 min
3	gi|124871098	Extracellular solute-binding protein, family 12 [Burkholderia cenocepacia PC184]	223	32936	24	6	10	3	38.7	9.11	630	3	0	0	821.3881	1640.7617	2	1640.7538	0.0079	0	16.62	1.20E+03	R	AVAFMMDDALLAGER	A	2 Oxidation (M)	0.000022000000000.0	Cmpd 426, AutoMSn(821.3881), 20.7 min
3	gi|124871098	Extracellular solute-binding protein, family 12 [Burkholderia cenocepacia PC184]	223	32936	24	6	10	3	38.7	9.11	631	2	0	0	821.3897	1640.7648	2	1640.7538	0.011	0	97.17	1.00E-05	R	AVAFMMDDALLAGER	A	2 Oxidation (M)	0.000022000000000.0	Cmpd 429, AutoMSn(821.3897), 20.8 min
3	gi|124871098	Extracellular solute-binding protein, family 12 [Burkholderia cenocepacia PC184]	223	32936	24	6	10	3	38.7	9.11	632	7	0	0	547.9292	1640.7659	3	1640.7538	0.0121	0	41.16	4	R	AVAFMMDDALLAGER	A	2 Oxidation (M)	0.000022000000000.0	Cmpd 433, AutoMSn(547.9292), 20.9 min
3	gi|124871098	Extracellular solute-binding protein, family 12 [Burkholderia cenocepacia PC184]	223	32936	24	6	10	3	38.7	9.11	633	2	0	0	821.3903	1640.766	2	1640.7538	0.0122	0	98.4	7.60E-06	R	AVAFMMDDALLAGER	A	2 Oxidation (M)	0.000022000000000.0	Cmpd 432, AutoMSn(821.3903), 20.9 min
3	gi|124871098	Extracellular solute-binding protein, family 12 [Burkholderia cenocepacia PC184]	223	32936	24	6	10	3	38.7	9.11	661	1	0	0	594.661	1780.9612	3	1780.9108	0.0504	0	48.87	0.65	R	QQQAAFSDTIFVIGTR	L			Cmpd 447, AutoMSn(594.6610), 21.2 min
3	gi|124871098	Extracellular solute-binding protein, family 12 [Burkholderia cenocepacia PC184]	223	32936	24	6	10	3	38.7	9.11	662	1	0	0	594.6624	1780.9655	3	1780.9108	0.0547	0	40.94	4	R	QQQAAFSDTIFVIGTR	L			Cmpd 444, AutoMSn(594.6624), 21.1 min
3	gi|124871098	Extracellular solute-binding protein, family 12 [Burkholderia cenocepacia PC184]	223	32936	24	6	10	3	38.7	9.11	667	4	0	0	614.3086	1839.9039	3	1839.8859	0.018	1	27.67	81	R	AVAFMMDDALLAGERAK	A	2 Oxidation (M)	0.00002200000000000.0	Cmpd 340, AutoMSn(614.3086), 18.7 min
3	gi|124871098	Extracellular solute-binding protein, family 12 [Burkholderia cenocepacia PC184]	223	32936	24	6	10	3	38.7	9.11	711	1	0	0	789.7071	2366.0995	3	2366.0815	0.018	0	37.01	8.6	R	ESSIPFSYYDQNQQVVGYSR	E			Cmpd 488, AutoMSn(789.7071), 22.1 min
3	gi|124871098	Extracellular solute-binding protein, family 12 [Burkholderia cenocepacia PC184]	223	32936	24	6	10	3	38.7	9.11	712	1	0	0	789.7083	2366.1031	3	2366.0815	0.0216	0	59.36	0.05	R	ESSIPFSYYDQNQQVVGYSR	E			Cmpd 503, AutoMSn(789.7083), 22.5 min
3	gi|124871098	Extracellular solute-binding protein, family 12 [Burkholderia cenocepacia PC184]	223	32936	24	6	10	3	38.7	9.11	713	1	0	0	789.7084	2366.1033	3	2366.0815	0.0218	0	86.99	8.50E-05	R	ESSIPFSYYDQNQQVVGYSR	E			Cmpd 491, AutoMSn(789.7084), 22.2 min
3	gi|124871098	Extracellular solute-binding protein, family 12 [Burkholderia cenocepacia PC184]	223	32936	24	6	10	3	38.7	9.11	714	1	0	0	789.7085	2366.1038	3	2366.0815	0.0223	0	60.13	0.041	R	ESSIPFSYYDQNQQVVGYSR	E			Cmpd 494, AutoMSn(789.7085), 22.3 min	emPAI	0.47
4	gi|501082785	amino acid transporter [Citrobacter koseri]	187	35142	11	4	4	2	10.4	6.92	605	2	0	1	763.4077	1524.8009	2	1524.7937	0.0072	0	80.61	0.00046	K	QAAFSDTIFIVGTR	L			Cmpd 576, AutoMSn(763.4077), 24.1 min
4	gi|501082785	amino acid transporter [Citrobacter koseri]	187	35142	11	4	4	2	10.4	6.92	606	2	0	1	763.4079	1524.8012	2	1524.7937	0.0075	0	56.8	0.11	K	QAAFSDTIFIVGTR	L			Cmpd 584, AutoMSn(763.4079), 24.3 min
4	gi|501082785	amino acid transporter [Citrobacter koseri]	187	35142	11	4	4	2	10.4	6.92	282	1	0	1	763.4085	1524.8024	2	1524.7937	0.0087	0	54.43	0.66	K	QAAFSDTIFIVGTR	L			Cmpd 570, AutoMSn(763.4085), 24.0 min
4	gi|501082785	amino acid transporter [Citrobacter koseri]	187	35142	11	4	4	2	10.4	6.92	607	2	0	1	763.4089	1524.8031	2	1524.7937	0.0095	0	85.88	0.00014	K	QAAFSDTIFIVGTR	L			Cmpd 573, AutoMSn(763.4089), 24.1 min
4	gi|501082785	amino acid transporter [Citrobacter koseri]	187	35142	11	4	4	2	10.4	6.92	608	3	0	1	509.275	1524.8032	3	1524.7937	0.0095	0	32.51	30	K	QAAFSDTIFIVGTR	L			Cmpd 583, AutoMSn(509.2750), 24.3 min
4	gi|501082785	amino acid transporter [Citrobacter koseri]	187	35142	11	4	4	2	10.4	6.92	630	3	0	0	821.3881	1640.7617	2	1640.7538	0.0079	0	16.62	1.20E+03	R	AVAFMMDDALLAGER	A	2 Oxidation (M)	0.000022000000000.0	Cmpd 426, AutoMSn(821.3881), 20.7 min
4	gi|501082785	amino acid transporter [Citrobacter koseri]	187	35142	11	4	4	2	10.4	6.92	631	2	0	0	821.3897	1640.7648	2	1640.7538	0.011	0	97.17	1.00E-05	R	AVAFMMDDALLAGER	A	2 Oxidation (M)	0.000022000000000.0	Cmpd 429, AutoMSn(821.3897), 20.8 min
4	gi|501082785	amino acid transporter [Citrobacter koseri]	187	35142	11	4	4	2	10.4	6.92	632	7	0	0	547.9292	1640.7659	3	1640.7538	0.0121	0	41.16	4	R	AVAFMMDDALLAGER	A	2 Oxidation (M)	0.000022000000000.0	Cmpd 433, AutoMSn(547.9292), 20.9 min
4	gi|501082785	amino acid transporter [Citrobacter koseri]	187	35142	11	4	4	2	10.4	6.92	633	2	0	0	821.3903	1640.766	2	1640.7538	0.0122	0	98.4	7.60E-06	R	AVAFMMDDALLAGER	A	2 Oxidation (M)	0.000022000000000.0	Cmpd 432, AutoMSn(821.3903), 20.9 min
4	gi|501082785	amino acid transporter [Citrobacter koseri]	187	35142	11	4	4	2	10.4	6.92	661	6	0	1	594.661	1780.9612	3	1780.9472	0.014	1	35.42	14	R	QKQAAFSDTIFIVGTR	L			Cmpd 447, AutoMSn(594.6610), 21.2 min
4	gi|501082785	amino acid transporter [Citrobacter koseri]	187	35142	11	4	4	2	10.4	6.92	667	4	0	0	614.3086	1839.9039	3	1839.8859	0.018	1	27.67	81	R	AVAFMMDDALLAGERAK	A	2 Oxidation (M)	0.00002200000000000.0	Cmpd 340, AutoMSn(614.3086), 18.7 min	emPAI	0.2
5	gi|550906228	amino acid transporter [Desulfovibrio desulfuricans]	164	33466	6	2	2	1	5.6	8.65	630	3	0	1	821.3881	1640.7617	2	1640.7868	-0.0251	0	16.62	1.20E+03	R	AVAFFMDDALLAGER	A	Oxidation (M)	0.000002000000000.0	Cmpd 426, AutoMSn(821.3881), 20.7 min
5	gi|550906228	amino acid transporter [Desulfovibrio desulfuricans]	164	33466	6	2	2	1	5.6	8.65	631	1	0	1	821.3897	1640.7648	2	1640.7868	-0.022	0	113.76	2.20E-07	R	AVAFFMDDALLAGER	A	Oxidation (M)	0.000002000000000.0	Cmpd 429, AutoMSn(821.3897), 20.8 min
5	gi|550906228	amino acid transporter [Desulfovibrio desulfuricans]	164	33466	6	2	2	1	5.6	8.65	632	7	0	1	547.9292	1640.7659	3	1640.7868	-0.0209	0	41.16	4	R	AVAFFMDDALLAGER	A	Oxidation (M)	0.000002000000000.0	Cmpd 433, AutoMSn(547.9292), 20.9 min
5	gi|550906228	amino acid transporter [Desulfovibrio desulfuricans]	164	33466	6	2	2	1	5.6	8.65	633	1	0	1	821.3903	1640.766	2	1640.7868	-0.0208	0	110.35	4.90E-07	R	AVAFFMDDALLAGER	A	Oxidation (M)	0.000002000000000.0	Cmpd 432, AutoMSn(821.3903), 20.9 min
5	gi|550906228	amino acid transporter [Desulfovibrio desulfuricans]	164	33466	6	2	2	1	5.6	8.65	665	5	1	1	614.3066	1839.8981	3	1839.9189	-0.0208	1	18.91	6.10E+02	R	AVAFFMDDALLAGERAK	A	Oxidation (M)	0.00000200000000000.0	Cmpd 338, AutoMSn(614.3066), 18.6 min
5	gi|550906228	amino acid transporter [Desulfovibrio desulfuricans]	164	33466	6	2	2	1	5.6	8.65	667	3	0	1	614.3086	1839.9039	3	1839.9189	-0.015	1	35.73	13	R	AVAFFMDDALLAGERAK	A	Oxidation (M)	0.00000200000000000.0	Cmpd 340, AutoMSn(614.3086), 18.7 min	emPAI	0.1
6	gi|495165889	amino acid transporter [Pantoea sp. GM01]	160	32832	9	4	3	2	10.4	8.63	605	3	0	1	763.4077	1524.8009	2	1524.7937	0.0072	0	68.09	0.0082	K	QAAFSDTVFIIGTR	L			Cmpd 576, AutoMSn(763.4077), 24.1 min
6	gi|495165889	amino acid transporter [Pantoea sp. GM01]	160	32832	9	4	3	2	10.4	8.63	606	3	0	1	763.4079	1524.8012	2	1524.7937	0.0075	0	45.62	1.5	K	QAAFSDTVFIIGTR	L			Cmpd 584, AutoMSn(763.4079), 24.3 min
6	gi|495165889	amino acid transporter [Pantoea sp. GM01]	160	32832	9	4	3	2	10.4	8.63	282	3	0	1	763.4085	1524.8024	2	1524.7937	0.0087	0	32.53	1.00E+02	K	QAAFSDTVFIIGTR	L			Cmpd 570, AutoMSn(763.4085), 24.0 min
6	gi|495165889	amino acid transporter [Pantoea sp. GM01]	160	32832	9	4	3	2	10.4	8.63	607	3	0	1	763.4089	1524.8031	2	1524.7937	0.0095	0	75.89	0.0014	K	QAAFSDTVFIIGTR	L			Cmpd 573, AutoMSn(763.4089), 24.1 min
6	gi|495165889	amino acid transporter [Pantoea sp. GM01]	160	32832	9	4	3	2	10.4	8.63	630	3	0	0	821.3881	1640.7617	2	1640.7538	0.0079	0	16.62	1.20E+03	R	AVAFMMDDALLAGER	A	2 Oxidation (M)	0.000022000000000.0	Cmpd 426, AutoMSn(821.3881), 20.7 min
6	gi|495165889	amino acid transporter [Pantoea sp. GM01]	160	32832	9	4	3	2	10.4	8.63	631	2	0	0	821.3897	1640.7648	2	1640.7538	0.011	0	97.17	1.00E-05	R	AVAFMMDDALLAGER	A	2 Oxidation (M)	0.000022000000000.0	Cmpd 429, AutoMSn(821.3897), 20.8 min
6	gi|495165889	amino acid transporter [Pantoea sp. GM01]	160	32832	9	4	3	2	10.4	8.63	632	7	0	0	547.9292	1640.7659	3	1640.7538	0.0121	0	41.16	4	R	AVAFMMDDALLAGER	A	2 Oxidation (M)	0.000022000000000.0	Cmpd 433, AutoMSn(547.9292), 20.9 min
6	gi|495165889	amino acid transporter [Pantoea sp. GM01]	160	32832	9	4	3	2	10.4	8.63	633	2	0	0	821.3903	1640.766	2	1640.7538	0.0122	0	98.4	7.60E-06	R	AVAFMMDDALLAGER	A	2 Oxidation (M)	0.000022000000000.0	Cmpd 432, AutoMSn(821.3903), 20.9 min
6	gi|495165889	amino acid transporter [Pantoea sp. GM01]	160	32832	9	4	3	2	10.4	8.63	667	4	0	0	614.3086	1839.9039	3	1839.8859	0.018	1	27.67	81	R	AVAFMMDDALLAGERAK	A	2 Oxidation (M)	0.00002200000000000.0	Cmpd 340, AutoMSn(614.3086), 18.7 min	emPAI	0.21
7	gi|516387353	ABC transporter [Burkholderia kururiensis]	140	32701	18	3	6	2	23.6	8.99	478	1	0	0	611.8215	1221.6285	2	1221.6201	0.0084	0	57.91	0.094	K	TVVTTAGTTSER	L			Cmpd 87, AutoMSn(611.8215), 12.9 min
7	gi|516387353	ABC transporter [Burkholderia kururiensis]	140	32701	18	3	6	2	23.6	8.99	479	1	0	0	611.8229	1221.6312	2	1221.6201	0.0111	0	55.53	0.16	K	TVVTTAGTTSER	L			Cmpd 90, AutoMSn(611.8229), 13.0 min
7	gi|516387353	ABC transporter [Burkholderia kururiensis]	140	32701	18	3	6	2	23.6	8.99	480	1	0	0	611.8235	1221.6325	2	1221.6201	0.0124	0	61.7	0.039	K	TVVTTAGTTSER	L			Cmpd 84, AutoMSn(611.8235), 12.8 min
7	gi|516387353	ABC transporter [Burkholderia kururiensis]	140	32701	18	3	6	2	23.6	8.99	511	1	0	0	640.377	1278.7395	2	1278.7408	-0.0013	1	38.02	9.2	K	IKDTGVIALGHR	E			Cmpd 165, AutoMSn(640.3770), 14.7 min
7	gi|516387353	ABC transporter [Burkholderia kururiensis]	140	32701	18	3	6	2	23.6	8.99	513	2	0	0	640.3818	1278.749	2	1278.7408	0.0082	1	23.73	2.50E+02	K	IKDTGVIALGHR	E			Cmpd 162, AutoMSn(640.3818), 14.6 min
7	gi|516387353	ABC transporter [Burkholderia kururiensis]	140	32701	18	3	6	2	23.6	8.99	514	1	0	0	427.2579	1278.7519	3	1278.7408	0.0111	1	40.59	5.2	K	IKDTGVIALGHR	E			Cmpd 158, AutoMSn(427.2579), 14.5 min
7	gi|516387353	ABC transporter [Burkholderia kururiensis]	140	32701	18	3	6	2	23.6	8.99	515	1	0	0	427.2581	1278.7524	3	1278.7408	0.0116	1	37.69	10	K	IKDTGVIALGHR	E			Cmpd 161, AutoMSn(427.2581), 14.6 min
7	gi|516387353	ABC transporter [Burkholderia kururiensis]	140	32701	18	3	6	2	23.6	8.99	516	5	0	0	427.2597	1278.7573	3	1278.7408	0.0165	1	22.29	3.50E+02	K	IKDTGVIALGHR	E			Cmpd 156, AutoMSn(427.2597), 14.5 min
7	gi|516387353	ABC transporter [Burkholderia kururiensis]	140	32701	18	3	6	2	23.6	8.99	584	2	0	0	492.8985	1475.6737	3	1475.6641	0.0096	0	31.39	41	K	DHGESFQTLETGR	A			Cmpd 230, AutoMSn(492.8985), 16.2 min
7	gi|516387353	ABC transporter [Burkholderia kururiensis]	140	32701	18	3	6	2	23.6	8.99	585	1	0	0	492.8999	1475.6779	3	1475.6641	0.0138	0	34.28	21	K	DHGESFQTLETGR	A			Cmpd 227, AutoMSn(492.8999), 16.1 min
7	gi|516387353	ABC transporter [Burkholderia kururiensis]	140	32701	18	3	6	2	23.6	8.99	586	1	0	0	492.9035	1475.6888	3	1475.6641	0.0247	0	34.53	20	K	DHGESFQTLETGR	A			Cmpd 225, AutoMSn(492.9035), 16.0 min
7	gi|516387353	ABC transporter [Burkholderia kururiensis]	140	32701	18	3	6	2	23.6	8.99	630	3	0	0	821.3881	1640.7617	2	1640.7538	0.0079	0	16.62	1.20E+03	R	AVAFMMDDALLAGER	A	2 Oxidation (M)	0.000022000000000.0	Cmpd 426, AutoMSn(821.3881), 20.7 min
7	gi|516387353	ABC transporter [Burkholderia kururiensis]	140	32701	18	3	6	2	23.6	8.99	631	2	0	0	821.3897	1640.7648	2	1640.7538	0.011	0	97.17	1.00E-05	R	AVAFMMDDALLAGER	A	2 Oxidation (M)	0.000022000000000.0	Cmpd 429, AutoMSn(821.3897), 20.8 min
7	gi|516387353	ABC transporter [Burkholderia kururiensis]	140	32701	18	3	6	2	23.6	8.99	632	7	0	0	547.9292	1640.7659	3	1640.7538	0.0121	0	41.16	4	R	AVAFMMDDALLAGER	A	2 Oxidation (M)	0.000022000000000.0	Cmpd 433, AutoMSn(547.9292), 20.9 min
7	gi|516387353	ABC transporter [Burkholderia kururiensis]	140	32701	18	3	6	2	23.6	8.99	633	2	0	0	821.3903	1640.766	2	1640.7538	0.0122	0	98.4	7.60E-06	R	AVAFMMDDALLAGER	A	2 Oxidation (M)	0.000022000000000.0	Cmpd 432, AutoMSn(821.3903), 20.9 min
7	gi|516387353	ABC transporter [Burkholderia kururiensis]	140	32701	18	3	6	2	23.6	8.99	661	1	0	0	594.661	1780.9612	3	1780.9108	0.0504	0	48.87	0.65	R	QQQAAFSDTIFVIGTR	L			Cmpd 447, AutoMSn(594.6610), 21.2 min
7	gi|516387353	ABC transporter [Burkholderia kururiensis]	140	32701	18	3	6	2	23.6	8.99	662	1	0	0	594.6624	1780.9655	3	1780.9108	0.0547	0	40.94	4	R	QQQAAFSDTIFVIGTR	L			Cmpd 444, AutoMSn(594.6624), 21.1 min
7	gi|516387353	ABC transporter [Burkholderia kururiensis]	140	32701	18	3	6	2	23.6	8.99	667	4	0	0	614.3086	1839.9039	3	1839.8859	0.018	1	27.67	81	R	AVAFMMDDALLAGERAK	S	2 Oxidation (M)	0.00002200000000000.0	Cmpd 340, AutoMSn(614.3086), 18.7 min	emPAI	0.21
8	gi|494010495	RNA polymerase sigma factor rpoD [Prevotella micans]	70	33122	3	1	1	1	3.8	9.18	474	2	0	1	607.837	1213.6594	2	1213.6918	-0.0324	1	47.8	1	K	VVDEGLVKEVK	E			Cmpd 304, AutoMSn(607.8370), 17.8 min
8	gi|494010495	RNA polymerase sigma factor rpoD [Prevotella micans]	70	33122	3	1	1	1	3.8	9.18	475	2	0	1	607.8382	1213.6618	2	1213.6918	-0.03	1	50.69	0.54	K	VVDEGLVKEVK	E			Cmpd 301, AutoMSn(607.8382), 17.8 min
8	gi|494010495	RNA polymerase sigma factor rpoD [Prevotella micans]	70	33122	3	1	1	1	3.8	9.18	476	1	0	1	607.8384	1213.6623	2	1213.6918	-0.0295	1	69.83	0.0065	K	VVDEGLVKEVK	E			Cmpd 307, AutoMSn(607.8384), 17.9 min	emPAI	0.1
9	gi|217396303	outer membrane protein A [Burkholderia pseudomallei 576]	53	19333	12	0	7	0	57	9.47	501	1	1	0	631.8439	1261.6733	2	1261.6666	0.0066	1	25.59	1.70E+02	K	GVPANKVYTEGK	G			Cmpd 80, AutoMSn(631.8439), 12.7 min
9	gi|217396303	outer membrane protein A [Burkholderia pseudomallei 576]	53	19333	12	0	7	0	57	9.47	225	2	1	0	646.7695	1291.5244	2	1291.6197	-0.0953	0	18.38	5.10E+03	R	DAFWTPATANAK	C			Cmpd 412, AutoMSn(646.7695), 20.4 min
9	gi|217396303	outer membrane protein A [Burkholderia pseudomallei 576]	53	19333	12	0	7	0	57	9.47	565	1	1	0	722.391	1442.7675	2	1442.7617	0.0059	0	32.93	29	R	VEVEVVGTQEVQK	T			Cmpd 290, AutoMSn(722.3911), 17.5 min
9	gi|217396303	outer membrane protein A [Burkholderia pseudomallei 576]	53	19333	12	0	7	0	57	9.47	617	1	1	0	533.9641	1598.8705	3	1598.8628	0.0077	1	33.39	25	R	RVEVEVVGTQEVQK	T			Cmpd 213, AutoMSn(533.9641), 15.8 min
9	gi|217396303	outer membrane protein A [Burkholderia pseudomallei 576]	53	19333	12	0	7	0	57	9.47	618	5	1	0	533.9657	1598.8753	3	1598.8628	0.0125	1	22.48	3.00E+02	R	RVEVEVVGTQEVQK	T			Cmpd 215, AutoMSn(533.9657), 15.8 min
9	gi|217396303	outer membrane protein A [Burkholderia pseudomallei 576]	53	19333	12	0	7	0	57	9.47	376	2	1	0	934.4053	1866.7961	2	1866.9146	-0.1185	0	22.28	1.00E+03	K	IQGMNVEVVVATGYTDR	I	Oxidation (M)	0.00020000000000000.0	Cmpd 395, AutoMSn(934.4053), 19.9 min
9	gi|217396303	outer membrane protein A [Burkholderia pseudomallei 576]	53	19333	12	0	7	0	57	9.47	214	2	1	0	623.3148	1866.9226	3	1866.9146	0.0081	0	31.14	1.30E+02	K	IQGMNVEVVVATGYTDR	I	Oxidation (M)	0.00020000000000000.0	Cmpd 396, AutoMSn(623.3148), 20.0 min
9	gi|217396303	outer membrane protein A [Burkholderia pseudomallei 576]	53	19333	12	0	7	0	57	9.47	674	1	1	0	623.3168	1866.9286	3	1866.9146	0.014	0	33.68	20	K	IQGMNVEVVVATGYTDR	I	Oxidation (M)	0.00020000000000000.0	Cmpd 393, AutoMSn(623.3168), 19.9 min
9	gi|217396303	outer membrane protein A [Burkholderia pseudomallei 576]	53	19333	12	0	7	0	57	9.47	705	2	1	1	781.091	2340.2511	3	2340.2365	0.0145	1	21.22	3.30E+02	K	ITYQADTLFDFDKAVLKPAGK	Q			Cmpd 504, AutoMSn(781.0910), 22.5 min
9	gi|217396303	outer membrane protein A [Burkholderia pseudomallei 576]	53	19333	12	0	7	0	57	9.47	706	1	1	1	781.0914	2340.2524	3	2340.2365	0.0158	1	52.78	0.23	K	ITYQADTLFDFDKAVLKPAGK	Q			Cmpd 506, AutoMSn(781.0914), 22.5 min
9	gi|217396303	outer membrane protein A [Burkholderia pseudomallei 576]	53	19333	12	0	7	0	57	9.47	707	1	1	1	781.0955	2340.2648	3	2340.2365	0.0283	1	29.73	47	K	ITYQADTLFDFDKAVLKPAGK	Q			Cmpd 501, AutoMSn(781.0955), 22.4 min
9	gi|217396303	outer membrane protein A [Burkholderia pseudomallei 576]	53	19333	12	0	7	0	57	9.47	734	1	1	1	834.1165	2499.3276	3	2499.3155	0.0121	0	28.69	55	K	CDGALVAQAPAPAPVAPVAPAITSQK	I	Carbamidomethyl (C)	0.10000000000000000000000000.0	Cmpd 513, AutoMSn(834.1165), 22.7 min	emPAI	0.17
10	gi|663597844	hypothetical protein [Allokutzneria albata]	44	28372	1	0	1	0	8.8	10.36	725	1	1	1	804.4424	2410.3053	3	2410.2465	0.0587	1	44.39	1.6	R	SRPDRLAALAAASGYADQAHLTR	E			Cmpd 681, AutoMSn(804.4424), 26.9 min	emPAI	0.12
11	gi|410121694	hypothetical protein BN427_2056 [Klebsiella pneumoniae subsp. pneumoniae ST258-K28BO]	41	17675	1	0	1	0	9.9	11.14	658	1	1	1	891.4834	1780.9522	2	1780.8063	0.1459	0	40.93	4	R	QQQAAFHAEPAGNPCR	Q	Carbamidomethyl (C)	0.0000000000000010.0	Cmpd 448, AutoMSn(891.4834), 21.2 min	emPAI	0.19
12	gi|557421329	helicase [Streptomyces sp. GBA 94-10]	36	104034	1	0	1	0	1.5	5.98	164	1	1	1	575.769	1724.2851	3	1723.8716	0.4135	0	36.44	82	R	HEMGTHWSLVSLLAK	E	Oxidation (M)	0.002000000000000.0	Cmpd 181, AutoMSn(575.7690), 15.0 min	emPAI	0.03
13	gi|646859420	NAD-dependent dehydratase [Burkholderia sp. WSM2230]	36	36607	1	0	1	0	2.4	9.25	314	1	1	1	420.7505	839.4865	2	839.4865	0	0	35.8	13	K	APTVSLPR	W			Cmpd 238, AutoMSn(420.7505), 16.4 min	emPAI	0.09
14	gi|363414274	DNA polymerase III, alpha subunit [Acidovorax sp. NO-1]	36	203605	1	0	1	0	0.4	9.11	314	2	0	1	420.7505	839.4865	2	839.4323	0.0542	0	35.77	13	M	PAPCSPLR	V			Cmpd 238, AutoMSn(420.7505), 16.4 min	emPAI	0.02
15	gi|268310720	5-oxoprolinase (ATP-hydrolyzing) [Thermomonospora curvata DSM 43183]	15	131523	1	0	1	0	0.7	5.91	404	1	1	1	508.2966	1014.5785	2	1014.5206	0.0579	1	14.59	2.50E+03	R	ANAEEAVRR	V			Cmpd 99, AutoMSn(508.2966), 13.2 min	emPAI	0.02
16	gi|284008939	glycerol kinase [Arsenophonus nasoniae]	15	13906	1	0	1	0	6.5	5.21	404	1	0	1	508.2966	1014.5785	2	1014.4407	0.1379	1	14.59	2.50E+03	R	AKDWEEHT	-			Cmpd 99, AutoMSn(508.2966), 13.2 min	emPAI	0.25
17	gi|469928974	tail tape measure protein, putative [Micavibrio aeruginosavorus EPB]	15	95031	1	0	1	0	1	5.2	404	1	0	1	508.2966	1014.5785	2	1014.5206	0.0579	1	14.59	2.50E+03	R	AQGEEAVRR	A			Cmpd 99, AutoMSn(508.2966), 13.2 min	emPAI	0.03
18	gi|491130433	DNA methylase [Streptomyces ghanaensis]	15	105514	1	0	1	0	1.1	6.16	404	1	0	1	508.2966	1014.5785	2	1014.5094	0.0691	1	14.59	2.50E+03	R	KGAEEGTPAR	V			Cmpd 99, AutoMSn(508.2966), 13.2 min	emPAI	0.03
19	gi|494036683	aspartate aminotransferase [Chthoniobacter flavus]	15	45048	1	0	1	0	2.2	6.15	404	1	0	1	508.2966	1014.5785	2	1014.5206	0.0579	1	14.59	2.50E+03	R	ANAEEVARR	M			Cmpd 99, AutoMSn(508.2966), 13.2 min	emPAI	0.07
20	gi|516792841	MULTISPECIES: shikimate dehydrogenase [Streptomyces]	15	28796	1	0	1	0	3.6	4.85	404	1	0	1	508.2966	1014.5785	2	1014.5458	0.0328	1	14.59	2.50E+03	R	KAGEEALAAR	-			Cmpd 99, AutoMSn(508.2966), 13.2 min	emPAI	0.12
21	gi|518934137	membrane protein [Lactobacillus parabrevis]	15	25183	1	0	1	0	3.8	6.08	404	1	0	1	508.2966	1014.5785	2	1014.5458	0.0328	1	14.59	2.50E+03	M	AANEEVRVK	K			Cmpd 99, AutoMSn(508.2966), 13.2 min	emPAI	0.13
22	gi|544940265	hypothetical protein [Elizabethkingia meningoseptica]	15	107733	1	0	1	0	1	9.02	404	1	0	1	508.2966	1014.5785	2	1014.557	0.0215	1	14.59	2.50E+03	K	AGKGNSINVR	M			Cmpd 99, AutoMSn(508.2966), 13.2 min	emPAI	0.03
23	gi|551156819	hypothetical protein, partial [Poribacteria bacterium WGA-3G]	15	29574	1	0	1	0	3.4	5.81	404	1	0	1	508.2966	1014.5785	2	1014.5206	0.0579	1	14.59	2.50E+03	R	ANAEERGIR	F			Cmpd 99, AutoMSn(508.2966), 13.2 min	emPAI	0.11
24	gi|654438962	hypothetical protein [Pseudomonas sp. URMO17WK12:I4]	15	29184	1	0	1	0	3.4	5.07	404	1	0	1	508.2966	1014.5785	2	1014.5094	0.0691	0	14.59	2.50E+03	R	AGQEENVLR	T			Cmpd 99, AutoMSn(508.2966), 13.2 min	emPAI	0.11
